# Supplementary material for: Determining a safe upper limit of oxygen supplementation for adult patients: a systematic review
Source: PubMed Central journal article supplement — BMJ Open. 2021 Jul 26;11(7):e045057. doi: 10.1136/bmjopen-2020-045057 (PMC8314741; doi:10.1136/bmjopen-2020-045057), 2021-07-26
Supplement: bmjopen-2020-045057.draft_revisions.pdf [file bmjopen-2020-045057.draft_revisions.pdf]

# BMJ Open

BMJ Open is committed to open peer review. As part of this commitment we make the peer review history of every article we publish publicly available.

When an article is published we post the peer reviewers' comments and the authors' responses online. We also post the versions of the paper that were used during peer review. These are the versions that the peer review comments apply to.

The versions of the paper that follow are the versions that were submitted during the peer review process. They are not the versions of record or the final published versions. They should not be cited or distributed as the published version of this manuscript.

BMJ Open is an open access journal and the full, final, typeset and author-corrected version of record of the manuscript is available on our site with no access controls, subscription charges or pay-per-view fees (<http://bmjopen.bmj.com>).

If you have any questions on BMJ Open's open peer review process please email [info.bmjopen@bmj.com](mailto:info.bmjopen@bmj.com)

# BMJ Open

## Determining a safe upper limit of oxygen supplementation for adult patients: a systematic review

|                               |                                                                                                                                                                                                                                                                                                                                                                                                          |
|-------------------------------|----------------------------------------------------------------------------------------------------------------------------------------------------------------------------------------------------------------------------------------------------------------------------------------------------------------------------------------------------------------------------------------------------------|
| Journal:                      | <i>BMJ Open</i>                                                                                                                                                                                                                                                                                                                                                                                          |
| Manuscript ID                 | bmjopen-2020-045057                                                                                                                                                                                                                                                                                                                                                                                      |
| Article Type:                 | Original research                                                                                                                                                                                                                                                                                                                                                                                        |
| Date Submitted by the Author: | 23-Sep-2020                                                                                                                                                                                                                                                                                                                                                                                              |
| Complete List of Authors:     | Lassen, Mathilde Languille; Rigshospitalet, Department of Anaesthesia, Centre of Head and Orthopaedics<br>Risgaard, Bjarke; Rigshospitalet, Department of Anaesthesia, Centre of Head and Orthopaedics<br>Baekgaard, Josefine; Rigshospitalet, Department of Anaesthesia, Centre of Head and Orthopaedics<br>Rasmussen, Lars; Rigshospitalet, Department of Anaesthesia, Centre of Head and Orthopaedics |
| Keywords:                     | Adult anaesthesia < ANAESTHETICS, Adult intensive & critical care < INTENSIVE & CRITICAL CARE, RESPIRATORY MEDICINE (see Thoracic Medicine), Respiratory physiology < THORACIC MEDICINE                                                                                                                                                                                                                  |
|                               |                                                                                                                                                                                                                                                                                                                                                                                                          |

SCHOLARONE™  
Manuscripts

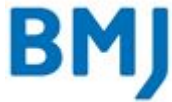

I, the Submitting Author has the right to grant and does grant on behalf of all authors of the Work (as defined in the below author licence), an exclusive licence and/or a non-exclusive licence for contributions from authors who are: i) UK Crown employees; ii) where BMJ has agreed a CC-BY licence shall apply, and/or iii) in accordance with the terms applicable for US Federal Government officers or employees acting as part of their official duties; on a worldwide, perpetual, irrevocable, royalty-free basis to BMJ Publishing Group Ltd ("BMJ") its licensees and where the relevant Journal is co-owned by BMJ to the co-owners of the Journal, to publish the Work in this journal and any other BMJ products and to exploit all rights, as set out in our [licence](#).

The Submitting Author accepts and understands that any supply made under these terms is made by BMJ to the Submitting Author unless you are acting as an employee on behalf of your employer or a postgraduate student of an affiliated institution which is paying any applicable article publishing charge ("APC") for Open Access articles. Where the Submitting Author wishes to make the Work available on an Open Access basis (and intends to pay the relevant APC), the terms of reuse of such Open Access shall be governed by a Creative Commons licence – details of these licences and which [Creative Commons](#) licence will apply to this Work are set out in our licence referred to above.

Other than as permitted in any relevant BMJ Author's Self Archiving Policies, I confirm this Work has not been accepted for publication elsewhere, is not being considered for publication elsewhere and does not duplicate material already published. I confirm all authors consent to publication of this Work and authorise the granting of this licence.

1  
2  
3  
4  
5 **Determining a safe upper limit of oxygen supplementation for adult**  
6 **patients: a systematic review**  
7  
8  
9

10  
11  
12  
13 Mathilde Languille Lassen

14 [mathilde.lassen.01@regionh.dk](mailto:mathilde.lassen.01@regionh.dk)

15  
16 Department of Anesthesia, Centre of Head and Orthopedics, 4231 Rigshospitalet,  
17 University of Copenhagen, Denmark  
18  
19

20  
21  
22 Bjarke Risgaard, MD, PhD

23 Department of Anesthesia, Centre of Head and Orthopedics, 4231 Rigshospitalet,  
24 University of Copenhagen, Denmark  
25  
26

27  
28  
29 Josefine S Bækgaard, MD, PhD

30 Department of Anesthesia, Centre of Head and Orthopedics, 4231 Rigshospitalet,  
31 University of Copenhagen, Denmark  
32  
33

34  
35  
36 Lars S Rasmussen, MD, PhD, DMSc

37 Department of Anesthesia, Centre of Head and Orthopedics, 4231 Rigshospitalet,  
38 University of Copenhagen, Denmark  
39  
40

41  
42 Responsible department:

43  
44 Department of Anesthesia, Centre of Head and Orthopedics, 4231 Rigshospitalet,  
45 University of Copenhagen, Denmark  
46  
47  
48  
49  
50  
51  
52  
53  
54  
55  
56  
57  
58  
59  
60

## Abstract

**Objective:** This systematic review aimed to describe the connection between the inspired oxygen fraction and pulmonary complications in adult patients, with the objective of determining a safe upper limit of oxygen supplementation.

**Methods:** MEDLINE and Embase were systematically searched in August 2019 (updated July 2020) for studies fulfilling the following criteria: intubated adult patients (Population); high fractions of oxygen (Intervention) versus low fractions of (Comparison); atelectasis, acute respiratory distress syndrome (ARDS), pneumonia and/or duration of mechanical ventilation (Outcome); original studies both observational and interventional (Studies). Screening, data extraction and risk of bias assessment was done by two independent reviewers.

**Results:** Out of 6120 records assessed for eligibility, 12 were included. Seven studies were conducted in the emergency setting, and five studies included patients undergoing elective surgery. Eight studies reported data on atelectasis, two on ARDS, four on pneumonia and two on duration of mechanical ventilation. There was a significantly increased risk of atelectasis if an oxygen fraction of 0.8 or above was used, Relative Risk (RR): 1.44 [1.05-1.97] (figure 2). One study showed an almost three-fold higher risk of pneumonia in the high oxygen fraction group (RR 2.83 [2.25-3.56]). The two studies reporting ARDS and the two studies with data on mechanical ventilation showed no association with oxygen fraction. Four studies had a high risk of bias in one domain.

**Conclusions:** In this systematic review we found adequate evidence to identify a safe upper dosage of oxygen, but the identified studies suggest a benefit of keeping inspiratory oxygen fraction below 0.8 with regards to formation of atelectases.

**PROSPERO registration number** CRD42020154242

## Strengths and limitations of this study

- The use of predefined Population, Intervention, Comparison, Outcome and Study design to assess studies for eligibility.
- The use of a wide search string in two databases.
- Two independent reviewers screening and including studies, assessing risk of bias and extracting data.
- There is a risk of publication bias that arises due to the possibility of missing unpublished studies.
- It is possible that our search did not identify all relevant studies.

## Funding

Departmental funding. Award/Grant number is not applicable.

## Introduction

Oxygen is a molecule vital for life, as it is the cornerstone in cellular respiration in all aerobic organisms. In trauma care, during anesthesia and in the management of respiratory failure, an oxygen fraction of 0.21 may not be sufficient to maintain an acceptable oxygen concentration in arterial blood and oxygen supplementation is therefore often part of standard care (1,2).

Supplementary oxygen may result in hyperoxaemia, with the risk of tissue hyperoxia. An increasing amount of evidence has connected hyperoxia and hyperoxaemia with increased mortality (3–6) possibly as a consequence of a variety of factors associated with hyperoxia: atelectasis in the lungs (7,8), formation of reactive oxygen species (9), impairment of the innate immune system (10), as well as vasoconstriction with paradox tissue hypoxia to follow (11).

All in all, hypoxia should be avoided, but at the same time it seems that exposure to high concentrations of oxygen may have serious consequences. Therefore, it is relevant to investigate if a safe upper dosage of oxygen can be identified.

This systematic review aimed to describe the connection between the inspired oxygen fraction  $FiO_2$  and pulmonary complications in intubated adult patients, with the objective of determining a safe upper limit of oxygen supplementation. We defined pulmonary complications as atelectasis, pneumonia and acute respiratory distress syndrome (ARDS).

## Methods

### Protocol and registration

Methods of the analysis and inclusion criteria were prespecified and documented in a protocol. The protocol was completed following the Preferred Reporting Items for Systematic Reviews and Meta-Analysis guidelines for protocols (12) and was registered in PROSPERO, the international prospective register of systematic reviews (13) (CRD42020154242).

### Eligibility criteria

Studies were selected according to following predefined Population, Intervention, Comparison, Outcome and Study design (PICOS).

### Inclusion criteria:

- **P**opulation: intubated patients  $\geq 18$  years

- **I**ntervention and **C**omparison: low inspiratory oxygen fraction (FiO<sub>2</sub>) (as defined by author) vs high FiO<sub>2</sub> (as defined by authors)
- **O**utcome: atelectasis, pneumonia, ARDS and duration of mechanical ventilation
- **S**tudy design: original studies both interventional and observational

#### **Exclusion criteria:**

- Hyperbaric oxygen treatment
- Case reports, review articles and editorials

We had no restrictions on year of publication. The search was restricted to studies published in French, English or Danish.

#### **Information sources and search**

We searched MEDLINE and Embase using the following predefined search string (presented search strategy is from MEDLINE).

1. (((((((oxygen [Title/Abstract]) OR oxygen[MeSH Terms]) OR hyperoxia[Title/Abstract]) OR "supplemental oxygen"[Title/Abstract]) OR "oxygen supplementation"[Title/Abstract]) OR fio2[Title/Abstract]))))
2. (((((((((((atelectasis[Title/Abstract]) OR pulmonary atelectasis[MeSH Terms]) OR pneumonia[Title/Abstract]) OR pneumonia[MeSH Terms]) OR "lung collapse"[Title/Abstract]) OR "collapsed lung"[Title/Abstract]) OR "acute lung injury"[Title/Abstract]) OR acute lung injury[MeSH Terms]) OR ARDS[Title/Abstract]) OR "acute respiratory distress syndrome"[Title/Abstract]) OR respiratory distress syndrome, adult[MeSH Terms]))))
3. (intub\*) OR "mechanical ventilation"
4. #1 AND #2 AND #3

The search was done the 6<sup>th</sup> of August 2019. The search was updated the 6<sup>th</sup> of July 2020.

Modifications were made to fit Embase.

We identified one additional record (14) by obtaining the full-text article of an abstract identified through the search string. Another record (15) was identified by screening the reference list of an article.



### Selection process

Two independent reviewers (MLL, BR) screened all titles and abstracts yielded by the search against the inclusion criteria using Covidence (an online program facilitating the production of systematic reviews developed by the Cochrane group) (16). A Cohen's Kappa for inter-rater reliability was calculated. The same reviewers obtained full text articles for all titles that appeared to meet the inclusion criteria or where there was any uncertainty. Disagreements were resolved through discussion until consensus. All full-text articles were assessed by the same two independent reviewers and those not meeting the inclusion criteria were excluded.

### Data collection and data items

Data extraction was done by two authors (MLL, BR), and was facilitated by the data-extraction tool Covidence and by using predefined forms. We collected study characteristics including trial design, trial size, country, period and year of publication. From the included studies we extracted the dosage of oxygen, type of control used, duration of treatment, patient characteristics (gender, age, patient type) as well as data on the predefined outcomes (atelectasis, pneumonia, ARDS) as defined by the authors.

### Risk of bias

Risk of bias for non-randomized studies were assessed by using the Newcastle Ottawa Scale (17). Here each study can be awarded from zero to nine stars, with zero stars representing a high risk of bias, and nine stars a low risk. Each study can be judged and awarded stars on eight items, categorized into three domains: selection of the study group, comparability of cohorts, and evaluation of the outcome of interest.

For randomized studies we used the Cochrane Collaboration tool for assessing risk of bias (Table 8.5.a in the Cochrane Handbook for Systematic Reviews of Intervention) in Covidence, which covers: sequence generation, allocation concealment, blinding, incomplete data and selective outcome reporting. A judgement as to the possible risk of bias on each domain were made from the extracted information, rated as "high risk", "low risk" or "unclear" risk of bias. These judgements were made based on the criteria for judging the risk of bias (Table 8.5.d in the Cochrane Handbook Higgins 2011).

## Summary measures and synthesis of results

This systematic review was expected to be a descriptive summary of the current evidence on oxygen supplementation and pulmonary complications. Relative risk was calculated where possible and a forest plot was used to illustrate the results.

## Patient and Public Involvement

No patient involved

For peer review only

## Results

### Study selection

Our initial search strategy identified 7734 records. After duplicates were removed and two additional records from other sources were added, 6120 records were screened. Of these, 6100 were excluded as they did not fulfil eligibility criteria leaving 20 records for full-text screening. Cohen's kappa for inter-rater reliability of 0.43 (CI: 0.26 to 0.6) was calculated, which is judged to be moderate agreement. After full-text review, 12 records fulfilled the inclusion criteria (figure 1).

### Study characteristics

Study characteristics are summarized in table 1. Eight of the 12 included studies were randomized controlled trials. Among the four remaining there were two retrospective observational studies (18,19) and two prospective observational studies (20,21). About half of the studies were conducted in Europe. Seven studies were conducted in the acute care setting. Of these seven, one study (22) included patients with septic shock, four studies (14,18,21,23) recruited surgical, medical and trauma patients that were mechanically ventilated in the intensive care unit, one study (20) included patients with acute lung injury and the last study (24) recruited patients with traumatic brain injury. The remaining five studies included patients undergoing different types of elective surgery. The administered  $FiO_2$  varied substantially among the studies, with oxygen fraction ranging from 0.26 to 0.6 in the low  $FiO_2$  group and from 0.36 to 1.0 in the high  $FiO_2$  group.

Table 2 presents the outcomes of interest reported in the included studies. Eight studies reported on the incidence of atelectasis, two studies reported on ARDS, four studies reported on pneumonia and two studies reported on the duration of mechanical ventilation.

#### *Atelectasis*

The eight studies reporting on atelectasis, generally showed better outcomes for patients in the low  $FiO_2$  group, as two studies (22,25) showed almost two-fold higher risk of atelectasis in the high  $FiO_2$ , with RR: 1.875 [0.42-8.37] and RR: 2.0 [1.06-3.79], respectively. One study (15) suggested a minor benefit of treatment with low  $FiO_2$ , but this was not statistically significant, RR: 1.46 [0.97-2.2]. Another study (24) found RR: 0.914 [0.56-1.5] suggesting a benefit of treatment with high  $FiO_2$ , but this was not statistically significant. These studies are illustrated in the forest plot (figure 2), which shows that in general treatment with high  $FiO_2$  was associated with higher risk of atelectasis formation, RR: 1.44 [1.05-1.97].

1  
2  
3  
4 *Rothen et al* (8) found a 16.8 times greater area of atelectasis in the high FiO<sub>2</sub> group and similarly,  
5 the study by *Benoit et al* (26) found a three-fold bigger atelectatic surface in the high FiO<sub>2</sub> group.  
6  
7 *Suzuki et al* (21) estimated atelectasis as time weighted averages, and also found a beneficial effect  
8 of a low FiO<sub>2</sub>. In the study by *Ishii et al* (18) additional information on intubated patients were  
9 found in an abstract (27) from the same study. They found a higher incidence of atelectasis in the  
10 high FiO<sub>2</sub> group, but the total number of patients was not reported.  
11  
12

### 13 ARDS

14  
15  
16 *Panwar et al* (14) showed an increase of new-onset ARDS in the low FiO<sub>2</sub> group, RR: 0.87 (0.43-  
17 1.75), but this was not statistically significant. The study by *Lång et al* (24) found three patients  
18 with ARDS in the low FiO<sub>2</sub> group, while no patients with ARDS were identified in the group  
19 receiving high FiO<sub>2</sub>.  
20  
21  
22

### 23 Pneumonia

24  
25 The study by *Staehr-Rye et al* (19) showed a significant increase in the incidence of pneumonia,  
26 RR: 2.83 [2.25-3.56] in the high FiO<sub>2</sub> group. Similarly, *Barrot et al* (23) showed a small, but  
27 nonsignificant, tendency to ventilator-associated pneumonias in the high FiO<sub>2</sub> group, RR: 1.26  
28 [0.71-2.22]. The two other studies, *Asfar et al* (22) and *Lång et al* (24), found a nonsignificant  
29 tendency for pneumonia in the low FiO<sub>2</sub> group with RR: 0.94 [0.59-1.49] and RR: 0.71 [0.26-1.97],  
30 respectively.  
31  
32  
33

### 34 Duration of mechanical ventilation

35  
36 The two studies reporting the duration of mechanical ventilation pointed in opposite direction.  
37  
38 *Lång et al* (24) reported slightly more time spent on mechanical ventilation in the low FiO<sub>2</sub> group,  
39 while *Rachmale et al* (20) reported a two-fold increase in time in the high FiO<sub>2</sub> group.  
40  
41  
42  
43

### 44 Risk of bias assessment

45  
46 Risk of bias for randomized studies are illustrated in table 3. Three studies had no blinding of  
47 participants, personal, or outcome assessment, leaving them with a high risk of bias on these  
48 domains (8,14,22). In the study by *Rothen et al* (8) it was unclear if a randomization was performed  
49 between the low FiO<sub>2</sub> group and the high FiO<sub>2</sub> group, indicating a high risk of bias.  
50  
51

52  
53 *Lång et al* (24) was an open-label trial, and was therefore awarded a high risk of bias on the domain  
54 of blinding of participants and personnel, however the outcome assessor was blinded.  
55

56 The four non-randomized studies were assessed using the New-Castle Ottawa Scale (17). One study  
57  
58  
59  
60

(20) scored six stars, two studies (18,19) scored seven stars and one study (21) scored 8 stars, indicating an overall high quality of the studies.

## Discussion

### *Summary of findings*

In this study we were not able to determine a safe upper limit of oxygen supplementation, due to inadequate evidence and heterogeneity as the included studies had different endpoints with varying definitions, and also different ways of defining low and high FiO<sub>2</sub>. In some studies the oxygen fraction in the low FiO<sub>2</sub> group was higher than in the high FiO<sub>2</sub> group in other studies.

Regarding atelectasis, seven of the eight studies favored a conservative oxygen strategy with low FiO<sub>2</sub> and an FiO<sub>2</sub> above 0.8 seemed to be associated with higher risk of atelectasis formation.

### *Strengths and limitations*

This study was conducted according to the PRISMA guidelines (28), ensuring a systematic and broadly acknowledged approach to the present literature. The strengths of this approach include predefined PICOS criteria to assess study eligibility, use of a wide search string in two databases, and two independent reviewers screened and assessed studies, including risk of bias.

Our study is limited by general weaknesses of systematic reviews. This includes risk of publication bias that arises due to the possibility of missing nonpublished studies, and the possibility that our search did not identify all relevant studies. The patient population was determined in very broad terms (intubated adult patients), resulting in more heterogeneity among the included studies.

Half of the randomized controlled trials were not blinded to personnel and participants, increasing the risk of performance bias. Three of these were not blinded to outcome assessors which increase the risk of detection bias. In general, many of the studies are relatively small, increasing the risk of other bias such as publication bias (table 3).

Atelectasis was defined in different ways complicating the pooling of data and the possibility to undertake a meta-analysis. Three studies (8,15,25) used CT-scans and they all considered densities between -100 to +100 Hounsfield as atelectasis. Of these three, one (8) measured areas of atelectasis in cm<sup>2</sup> whereas the two others (15,25) measured if atelectases were present or not. *Ishii et al* (18) also used CT-scans, but defined atelectases as areas with formation of more than 10 mm

1  
2  
3  
4 thick atelectasis from the first to the second scan. The study by *Staeher et al* (25) did not define  
5 specific criteria on when densities were judged as atelectasis or not.

6  
7  
8 *Asfar et al* (22) and *Suzuki et al* (21) used chest x-rays, without defining atelectasis specifically, as  
9 this was decided by the individual physician. *Lång et al* (24) used chest x-rays in the same manner,  
10 however they allowed the appliance of positive end-expiratory pressure to minimize atelectasis,  
11 which makes it hard to directly compare results with other studies. Only *Suzuki et al* (21) used more  
12 than one radiologist to perform the outcome assessment.  
13  
14  
15  
16

17  
18 In *Panwar et al* (14), new-onset ARDS was defined as subsequent occurrence of ARDS in those  
19 patients who did not have ARDS on day 0, and where ARDS was present according to the Berlin  
20 definition (29). *Lång et al* (24) did not report their definition of ARDS.  
21  
22  
23

24  
25 Regarding pneumonia, the database study of 26841 patients performed by *Staeher-Rye et al* (19)  
26 found a significant, almost three-fold higher risk of pneumonia in the liberal oxygen group,  
27 indicating that excess levels of oxygen may be harmful. However, this is an analysis of  
28 administrative data, with risk of misclassification bias and therefore direct conclusions should be  
29 drawn with caution.  
30  
31  
32  
33

### 34 35 *Other reviews*

36  
37 The evidence for the use of supplemental oxygen has been investigated in recently published  
38 systematic reviews. A systematic review and meta-analysis by *Damiani et al* (30) from 2014  
39 suggests an association between hyperoxia and mortality in patients with stroke, traumatic brain  
40 injury and those resuscitated from cardiac arrest. However, they concluded that their results were  
41 limited by the heterogeneity of the included studies. The same conclusion was drawn in another  
42 meta-analysis from 2015 by *Helmerhorst et al* (31). No definite conclusions could be made due to  
43 heterogeneity in the included studies; however the meta-analysis suggested a benefit of conservative  
44 oxygen therapy. In a Cochrane review from 2015 by *Wetterslev et al* (32), comparing low (FiO<sub>2</sub>  
45 0.30-0.40) vs high (FiO<sub>2</sub> 0.60-0.90) perioperative inspiratory oxygen fractions, they found no  
46 association between perioperative FiO<sub>2</sub> and postoperative surgical site infection and mortality. In  
47 another Cochrane review from 2016 performed by *Cabello et al* (33), they focused on patients with  
48 acute myocardial infarctions. They included five studies and found no clear recommendations on  
49 the use of oxygen supplementation.  
50  
51  
52  
53  
54  
55  
56  
57  
58  
59  
60

1  
2  
3  
4 In a recent meta-analysis performed in 2018 by *Chu et al* (4) they included 25 randomised  
5 controlled trials on acutely ill patients and found a significant association between liberal  
6 oxygenation strategies and increased mortality in-hospital, at 30 days and at longest follow-up.  
7  
8 Nevertheless, morbidity outcomes were similar between groups.  
9

10  
11 The available reviews are limited because of heterogeneity, including different outcome measures,  
12 overall indicate that excess oxygen is harmful, stressing the need for further investigation on this  
13 subject.  
14

15  
16 Oxygen supplementation is obviously a vital part of trauma care, practice of anesthesia, the  
17 management of respiratory distress, and treatment of a variety of other conditions. However,  
18 supplemental oxygen should be carefully considered a drug and prescribed adequately. There is a  
19 general lack of strong evidence for supplemental oxygen, and an upper limit of oxygen  
20 supplementation is not included in many guidelines (1, 31-33). Our study contributes to the current  
21 evidence in a different way, by looking at the association between  $FiO_2$  and pulmonary  
22 complications, which is a highly relevant indicator in the search for a safe upper limit of oxygen  
23 supplementation.  
24

25 As oxygen supplementation is so widely used, it is crucial that better evidence-based guidelines are  
26 developed. Future research is required to precisely define the oxygen therapy strategies to maximize  
27 benefits and minimize harms.  
28  
29

## 30 31 32 33 34 35 36 37 Conclusion

38  
39 In this systematic review we found that there was inadequate evidence to identify a safer upper  
40 dosage of oxygen, but the identified studies suggest a benefit of conservative oxygen therapy,  
41 defined as  $FiO_2 \leq 0.8$  with regards to formation of atelectasis.  
42  
43  
44  
45  
46  
47  
48  
49  
50  
51  
52  
53  
54  
55  
56  
57  
58  
59  
60

1  
2  
3  
4 Figure caption  
5

6 **Figure 1:** Preferred Reporting Items for Systematic Reviews and Meta-analysis (PRISMA) flow  
7 diagram of identification, screening, eligibility and inclusion process (28) on a search for studies  
8 comparing low dose oxygen supplementation with high dose oxygen supplementation with  
9 pulmonary complications as an outcome.  
10  
11  
12

13  
14 **Figure 2:** Forest plot of formation of atelectasis in studies comparing low  $\text{FiO}_2$  with high  $\text{FiO}_2$   
15  
16  
17  
18  
19  
20  
21  
22  
23  
24  
25  
26  
27  
28  
29  
30  
31  
32  
33  
34  
35  
36  
37  
38  
39  
40  
41  
42  
43  
44  
45  
46  
47  
48  
49  
50  
51  
52  
53  
54  
55  
56  
57  
58  
59  
60



## References

1. O'Driscoll BR, Howard LS, Earis J et al. British Thoracic Society Guideline for oxygen use in adults in healthcare and emergency settings. *BMJ Open Respir Res.* 2017;4(1):1–20.
2. Thim T, Vinther NH, Grove EL et al. Initial assessment and treatment with the Airway, Breathing, Circulation, Disability, Exposure (ABCDE) approach. *Int J Gen Med.* 2012;117–21.
3. Brenner M, Stein D, Hu P et al. Association between early hyperoxia and worse outcomes after traumatic brain injury. *Arch Surg.* 2012;147(11):1042–6.
4. Chu DK, Kim LHY, Young PJ et al. Mortality and morbidity in acutely ill adults treated with liberal versus conservative oxygen therapy (IOTA): a systematic review and meta-analysis. *Lancet* 2018;391(10131):1693–705.
5. Wang CH, Chang WT, Huang CH et al. The effect of hyperoxia on survival following adult cardiac arrest: a systematic review and meta-analysis of observational studies. *Resuscitation* 2014;85:1142–8
6. Girardis M, Busani S, Damiani E et al. Effect of conservative vs conventional oxygen therapy on mortality among patients in an intensive care unit the oxygen-ICU randomized clinical trial. *JAMA* 2016;316(15):1583–9
7. Aboab J, Jonson B, Kouatchet A et al. Effect of inspired oxygen fraction on alveolar derecruitment in acute respiratory distress syndrome. *Intensive Care Med.* 2006 Dec;32(12):1979–86.
8. Rothen HU, Sporre B, Engberg G et al. Prevention of atelectasis during general anaesthesia. *Lancet.* 1995;345(8962):1387–91
9. Turrens JF. Mitochondrial formation of reactive oxygen species. *J Physiol.* 2003;2:335–44
10. Baleeiro CEO, Wilcoxon SE, Morris SB et al. Sublethal Hyperoxia Impairs Pulmonary Innate Immunity. *J Immunol.* 2003;171:955–63.
11. Ariyaratnam P, Loubani M, Bennett R et al. Hyperoxic Vasoconstriction of Human Pulmonary Arteries: A Novel Insight into Acute Ventricular Septal Defects. *Hindawi ISRN Cardiology.* 2013;685735
12. Shamseer L, Moher D, Clarke M et al. Preferred reporting items for systematic review and meta-analysis protocols (prisma-p) 2015: Elaboration and explanation. *BMJ* 2015;349(December 2014):1–25.
13. PROSPERO. International prospective register of systematic reviews. <https://www.crd.york.ac.uk/prospero/>
14. Panwar R, Hardie M, Bellomo R et al. Conservative versus liberal oxygenation targets for mechanically ventilated patients: A pilot multicenter randomized controlled trial. *Am J Respir Crit Care Med.* 2016;193(1):43–51.
15. Akça O, Podolsky A, Eisenhuber E et al. Comparable postoperative pulmonary atelectasis in patients given 30% or 80% oxygen during and 2 hours after colon resection. *Anesthesiology.* 1999;91(4):991–8.
16. Covidence systematic review software. Veritas Health Innovation. Melbourne. [www.covidence.org](http://www.covidence.org).
17. Wells GA, B Shea, D O'Connell et al. The Newcastle-Ottawa Scale (NOS) for assessing the quality of nonrandomized studies in meta-analyses. *Evidence-based Public Health* 2012.

- 1  
2  
3  
4 [http://www.evidencebasedpublichealth.de/download/Newcastle\\_Ottawa\\_Scale\\_Pope\\_Bruce.pdf](http://www.evidencebasedpublichealth.de/download/Newcastle_Ottawa_Scale_Pope_Bruce.pdf)  
5  
6  
7 18. Ishii K, Morimatsu H, Ono K et al. Relationship between a High-inspired Oxygen  
8 Concentration and Dorsal Atelectasis in High-energy Trauma Patients. *Acta Med. Okayama*  
9 2020;74(1):17-26  
10  
11 19. Staehr-Rye A, Meyhoff CS, Scheffenbichler F et al. High intraoperative inspiratory oxygen  
12 fraction and risk of major respiratory complications. *Br J Anaesth* 2017;119(1):140–9.  
13  
14 20. Rachmale S, Li G, Wilson G et al. Practice of excessive FIO<sub>2</sub> and effect on pulmonary  
15 outcomes in mechanically ventilated patients with acute lung injury. *Respir Care*.  
16 2012;57(11):1887–93  
17  
18 21. Suzuki S, Eastwood GM, Goodwin MD et al. Atelectasis and mechanical ventilation mode  
19 during conservative oxygen therapy: A before-and-after study. *J Crit Care* 2015;30(6):1232–  
20 7  
21  
22 22. Asfar P, Schortgen F, Boissramé-Helms J et al. Hyperoxia and hypertonic saline in patients  
23 with septic shock (HYPER2S): a two-by-two factorial, multicentre, randomised, clinical  
24 trial. *Lancet Respir Med*. 2017;5(3):180–90  
25  
26 23. Barrot L, Asfar P, Mauny F et al. Liberal or Conservative Oxygen Therapy for Acute  
27 Respiratory Distress Syndrome. *N Engl J Med* 2020;382:999-1008  
28  
29 24. Lång M, Skrifvars MB, Siironen J et al. A pilot study of hyperoxemia on neurological  
30 injury, inflammation and oxidative stress. *Acta Anaesthesiol Scand*. 2018;62(6):801–10  
31  
32 25. Staehr AK, Meyhoff CS, Henneberg SW et al. Influence of perioperative oxygen fraction on  
33 pulmonary function after abdominal surgery: A randomized controlled trial. *BMC Res*  
34 *Notes*. 2012; 5:383  
35  
36 26. Benoît Z, Wicky S, Fischer JF et al. The Effect of Increased FIO<sub>2</sub> Before Tracheal  
37 Extubation on Postoperative Atelectasis. *Anesth Analg* 2002;95:1777–81  
38  
39 27. Ishii K, Morimatsu H, Ono K et al. Relationship between a high inspired oxygen  
40 concentration and a gravity dependent atelectasis in trauma patients: a subgroup analysis.  
41 2015 Annu Meet Int Anesth Res Soc IARS 2015 Honolulu, HI United States 2015;120(3  
42 SUPPL. 1):S109  
43  
44 28. Moher D, Liberati A, Tetzlaff J et al. Preferred reporting items for systematic reviews and  
45 meta-analyses: the PRISMA statement. *Int J Surg* 2010;8(8):658  
46  
47 29. Rawal G, Yadav S, Kumar R. Acute respiratory distress syndrome: An update and review. *J*  
48 *Transl Intern Med*. 2016;6(2):74–7.  
49  
50 30. Damiani E, Adrario E, Girardis M et al. Arterial hyperoxia and mortality in critically ill  
51 patients: A systematic review and meta-analysis. *Crit Care* 2014;18(1).  
52  
53 31. Helmerhorst HJF, Roos-Blom MJ, Van Westerloo DJ et al. Association between arterial  
54 hyperoxia and outcome in subsets of critical illness: A systematic review, meta-analysis, and  
55 meta-regression of cohort studies. *Crit Care Med* 2015;43(7):1508–19  
56  
57 32. Wetterslev J, Meyhoff CS, Jørgensen LN et al. The effects of high perioperative inspiratory  
58 oxygen fraction for adult surgical patients. *Cochrane Database Syst Rev* 2015(6):CD008884.  
59  
60 33. Cabello JB, Burls A, Emparanza JI et al. Oxygen therapy for acute myocardial infarction.  
*Cochrane Database Syst Rev* 2016(12): CD007160.  
34. Casaubon LK, Boulanger JM, Blacquièrre D et al. Canadian Stroke Best Practice  
Recommendations: Hyperacute Stroke Care Guidelines, Update 2015. *Int J Stroke*.  
2015;10(6):924–40

- 1  
2  
3  
4 35. Nikolaou NI, Welsford M, Beygui F et al. Part 5: Acute coronary syndromes. 2015  
5 International Consensus on Cardiopulmonary Resuscitation and Emergency Cardiovascular  
6 Care Science with Treatment Recommendations. Resuscitation. 2015;95(2015):e121–46  
7  
8 36. Moga C, Chojecki D. Oxygen therapy in acute care settings. Institute of Health Economics  
9 2016. <https://www.ihe.ca/publications/oxygen-therapy-in-acute-care-settings>  
10  
11  
12  
13  
14  
15  
16  
17  
18  
19  
20  
21  
22  
23  
24  
25  
26  
27  
28  
29  
30  
31  
32  
33  
34  
35  
36  
37  
38  
39  
40  
41  
42  
43  
44  
45  
46  
47  
48  
49  
50  
51  
52  
53  
54  
55  
56  
57  
58  
59  
60

For peer review only

**Table 1: Characteristics of studies comparing low FiO<sub>2</sub> with high FiO<sub>2</sub>, with lung complications as an outcome. Lung complications were atelectasis, ARDS, pneumonia and duration of mechanical ventilation.**

| Reference and year of publication | Country                | Setting                       | Study design                       | Sample size | Low dose oxygen                     | High dose oxygen       | Primary outcome                                                                                        |
|-----------------------------------|------------------------|-------------------------------|------------------------------------|-------------|-------------------------------------|------------------------|--------------------------------------------------------------------------------------------------------|
| Akca et al (1999) (15)            | Austria                | Elective surgery              | Randomized controlled trial        | 30          | 0.3                                 | 0.8                    | Atelectasis                                                                                            |
| Asfar et al (2017) (22)           | France                 | Septic shock                  | Randomized controlled trial        | 434         | SpO <sub>2</sub> between 88 and 95% | 1.0                    | Mortality day-28                                                                                       |
| Barrot et al (2020) (23)          | France                 | Critical care                 | Randomized controlled trial        | 205         | SpO <sub>2</sub> between 88 and 92% | SpO <sub>2</sub> ≥ 96% | Mortality day-28                                                                                       |
| Benoît et al (2002) (26)          | Switzerland            | Elective surgery              | Randomized controlled trial        | 20          | 0.4                                 | 1.0                    | Atelectasis                                                                                            |
| Ishii et al (2015) (18)           | Japan                  | Trauma                        | Retrospective cohort study         | 911         | < 0.6                               | > 0.6                  | Atelectasis                                                                                            |
| Lång et al (2018) (24)            | Finland                | Critical care                 | Randomized controlled trial        | 65          | 0.4                                 | 0.7                    | Levels of ROS, IL-6 and NSE                                                                            |
| Panwar et al (2015) (14)          | Australia, NZ & France | Critical care                 | Randomized controlled trial        | 104         | Mean = 0.26                         | Mean = 0.36            | Mean AUC for SpO <sub>2</sub> , SaO <sub>2</sub> , PaO <sub>2</sub> , and FIO <sub>2</sub> on days 0–7 |
| Rachmale et al (2012) (20)        | USA                    | Critical care                 | Prospective, observational study   | 210         | Mean = 0.4                          | Mean = 0.6             | Duration of exposure to excessive FiO <sub>2</sub> during the first 48 h of mechanical ventilation     |
| Rothen et al (1995) (8)           | Sweden                 | Elective surgery              | Randomized controlled trial        | 24          | 0.3                                 | 1.0                    | Atelectasis                                                                                            |
| Stæhr et al (2012) (25)           | Denmark                | Laparotomy for ovarian cancer | Randomized controlled trial        | 35          | 0.3                                 | 0.8                    | Change in PaO <sub>2</sub> /FiO <sub>2</sub>                                                           |
| Stæhr-Rye et al (2017) (19)       | USA                    | Non-cardiothoracic surgery    | Register study                     | 26841       | 0.31                                | 0.79                   | Major respiratory complications                                                                        |
| Suzuki et al (2015) (21)          | Australia              | Critical care                 | Prospective before-and-after study | 105         | 0.27                                | 0.40                   | Changes in atelectasis score                                                                           |

Abbreviations: AUC: area under the curve

**Table 2: Patient outcomes comparing low doses of oxygen supplementation with high doses of oxygen supplementation**

| Reference                          | Low dose oxygen            | High dose oxygen          | RR (95% CI)      |
|------------------------------------|----------------------------|---------------------------|------------------|
| Atelectasis                        |                            |                           |                  |
| Akca et al (15)                    | 9 (64%)                    | 15 (94%)                  | 1.46 (0.97-2.2)  |
| Asfar et al (22)                   | 13 (6%)                    | 26 (12%)                  | 2.0 (1.06-3.79)  |
| Benoit et al (26)                  | 2.5% of total surface      | 7% of total surface       | -                |
| Ishii et al (18)                   | 64% of patients            | 76.8% of patients         | -                |
| Lång et al (24)                    | 14 (52%)                   | 18 (47%)                  | 0.914 (0.56-1.5) |
| Rothen et al (8)                   | 0.25 cm <sup>2</sup> ± 0.4 | 4.2 cm <sup>2</sup> ± 5.6 | -                |
| Staehr et al (25)                  | 2 (13.3%)                  | 5 (25%)                   | 1.88 (0.42-8.37) |
| Suzuki et al (21)                  | TWA AS = 1.5 (0.7-2)       | TWA AS = 2 (1.2-2.2)      | -                |
| ARDS                               |                            |                           |                  |
| Lång et al (24)                    | 3 (11%)                    | 0 (0%)                    | -                |
| Panwar et al (14)                  | 11 (32%)                   | 11 (28%)                  | 0.87 (0.43-1.75) |
| Pneumonia                          |                            |                           |                  |
| Asfar et al (22)                   | 32 (15%)                   | 30 (14%)                  | 0.94 (0.59-1.49) |
| Barrot et al (23)                  | 17 (17.2%)                 | 22 (21.6%)                | 1.26 (0.71-2.22) |
| Lång et al (24)                    | 6 (22.2%)                  | 6 (15.8%)                 | 0.71 (0.26-1.97) |
| Staehr-Rye et al (19)              | 104 (0.7%)                 | 227 (1.9%)                | 2.83 (2.25-3.56) |
| Duration of mechanical ventilation |                            |                           |                  |
| Lång et al (24)                    | 6.3 days (4.7-10)          | 5 days (2.5-7.5)          | -                |
| Rachmale et al (20)                | 2.8 days (1-6)             | 6 days (3-10.5)           | -                |

Continuous data is presented as mean (SD) or median (IQR). Relative risk (RR) is presented with high dose oxygen in the numerator. Abbreviations: RR: relative risk, CI: confidence interval, TWA AS: time weighted average atelectasis, SD: standard deviation, IQR: interquartile range

**Table 3: Risk of bias assessment for randomized controlled trials comparing low dose oxygen supplementation with high dose oxygen supplementation. Risk of bias was assessed using Cochrane Collaboration tool for assessing risk of bias (Table 8.5.a in the Cochrane Handbook for Systematic Reviews of Intervention).**

|                                       | Akca et al | Asfar et al | Barrot et al | Benoit et al | Lång et al | Panwar et al | Rothen et al | Staehr et al |
|---------------------------------------|------------|-------------|--------------|--------------|------------|--------------|--------------|--------------|
| Random sequence generation            |            |             |              |              |            |              |              |              |
| Allocation concealment                |            |             |              |              |            |              |              |              |
| Blinding of participants and personal |            |             |              |              |            |              |              |              |
| Blinding of outcome assessment        |            |             |              |              |            |              |              |              |
| Incomplete outcome data               |            |             |              |              |            |              |              |              |
| Selective reporting                   |            |             |              |              |            |              |              |              |
| Other bias                            |            |             |              |              |            |              |              |              |

Green = low risk of bias, yellow = unclear risk of bias, red = high risk of bias

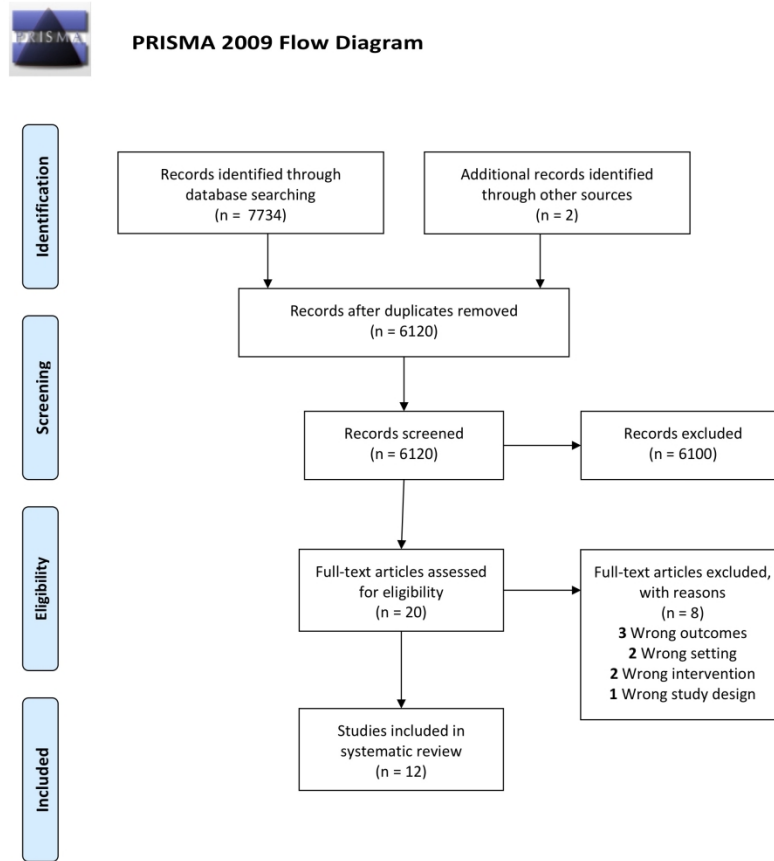

From: Moher D, Liberati A, Tetzlaff J, Altman DG, The PRISMA Group (2009). Preferred Reporting Items for Systematic Reviews and Meta-Analyses: The PRISMA Statement. *PLoS Med* 6(6): e1000097. doi:10.1371/journal.pmed1000097

For more information, visit [www.prisma-statement.org](http://www.prisma-statement.org).

**Figure 1:** Preferred Reporting Items for Systematic Reviews and Meta-analysis (PRISMA) flow diagram of identification, screening, eligibility and inclusion process (28) on a search for studies comparing low dose oxygen supplementation with high dose oxygen supplementation with pulmonary complications as an outcome.

215x279mm (300 x 300 DPI)

1  
2  
3  
4  
5  
6  
7  
8  
9  
10  
11  
12  
13  
14  
15  
16  
17  
18  
19  
20  
21  
22  
23  
24  
25  
26  
27  
28  
29  
30  
31  
32  
33  
34  
35  
36  
37  
38  
39  
40  
41  
42  
43  
44  
45  
46  
47  
48  
49  
50  
51  
52  
53  
54  
55  
56  
57  
58  
59  
60

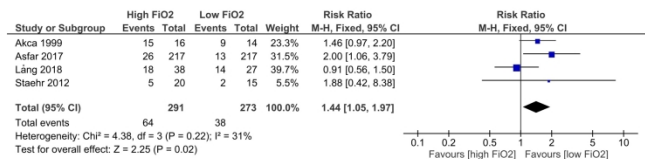

**Figure 2:** Forest plot of formation of atelectasis in studies comparing low FiO2 with high FiO2

209x297mm (300 x 300 DPI)



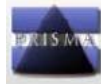

# PRISMA 2009 Checklist (Adapted for KIN 4400)

Page 1 of 2

| Section/topic                      | #  | Checklist item                                                                                                                                                                                                                                                       | Reported on page # |
|------------------------------------|----|----------------------------------------------------------------------------------------------------------------------------------------------------------------------------------------------------------------------------------------------------------------------|--------------------|
| <b>TITLE</b>                       |    |                                                                                                                                                                                                                                                                      |                    |
| Title                              | 1  | Identify the report as a literature review.                                                                                                                                                                                                                          | 1                  |
| <b>ABSTRACT</b>                    |    |                                                                                                                                                                                                                                                                      |                    |
| Structured summary                 | 2  | Provide a structured summary including, as applicable: background; objectives; data sources; study eligibility criteria, participants, and interventions; study appraisal and synthesis methods; results; limitations; conclusions and implications of key findings; | 2                  |
| <b>INTRODUCTION</b>                |    |                                                                                                                                                                                                                                                                      |                    |
| Rationale                          | 3  | Describe the rationale for the review in the context of what is already known about your topic.                                                                                                                                                                      | 3                  |
| Objectives                         | 4  | Provide an explicit statement of questions being addressed with reference to participants, interventions, comparisons, outcomes, and study design (PICOS).                                                                                                           | 3                  |
| <b>METHODS</b>                     |    |                                                                                                                                                                                                                                                                      |                    |
| Eligibility criteria               | 5  | Specify study characteristics (e.g., PICOS, length of follow-up) and report characteristics (e.g., years considered, language, publication status) used as criteria for eligibility, giving rationale.                                                               | 3                  |
| Information sources                | 6  | Describe all information sources (e.g., databases with dates of coverage) in the search and date last searched.                                                                                                                                                      | 4                  |
| Search                             | 7  | Present full electronic search strategy for at least one database, including any limits used, such that it could be repeated.                                                                                                                                        | 4                  |
| Study selection                    | 8  | State the process for selecting studies (i.e., screening, eligibility).                                                                                                                                                                                              | 5                  |
| Risk of bias in individual studies | 9  | Describe methods used for assessing risk of bias of individual studies (including specification of whether this was done at the study or outcome level).                                                                                                             | 5                  |
| Risk of bias across studies        | 10 | Specify any assessment of risk of bias that may affect the cumulative evidence (e.g., publication bias, selective reporting within studies).                                                                                                                         | 5                  |
| <b>RESULTS</b>                     |    |                                                                                                                                                                                                                                                                      |                    |
| Study selection                    | 11 | Give numbers of studies screened, assessed for eligibility, and included in the review, with reasons for exclusions at each stage, ideally with a flow diagram.                                                                                                      | 7                  |
| Study characteristics              | 12 | For each study, present characteristics for which data were extracted (e.g., study size, PICOS, follow-up period) and provide the citations.                                                                                                                         | 7                  |

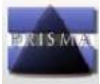

## PRISMA 2009 Checklist (Adapted for KIN 4400)

| Section/topic                              | #  | Checklist item                                                                                                                                                                                                                            | Reported on page # |
|--------------------------------------------|----|-------------------------------------------------------------------------------------------------------------------------------------------------------------------------------------------------------------------------------------------|--------------------|
| Synthesis of results of individual studies | 13 | For all outcomes considered (benefits or harms), present, for each study: (a) summary of results and (b) relationship to other studies under review (e.g. agreements or disagreements in methods, sampling, data collection or findings). | 7                  |
| <b>DISCUSSION</b>                          |    |                                                                                                                                                                                                                                           |                    |
| Summary of evidence                        | 14 | Summarize the main findings including the strength of evidence for each main outcome; consider their relevance to key groups (e.g., healthcare providers, users, and policy makers).                                                      | 9                  |
| Limitations                                | 15 | Discuss limitations at study and outcome level (e.g., risk of bias), and at review-level (e.g., incomplete retrieval of identified research, reporting bias).                                                                             | 9                  |
| <b>CONCLUSION</b>                          |    |                                                                                                                                                                                                                                           |                    |
| Conclusions                                | 16 | Provide a general interpretation of the results in the context of other evidence, and implications for future research.                                                                                                                   | 11                 |

Adapted from: Moher D, Liberati A, Tetzlaff J, Altman DG, The PRISMA Group (2009). Preferred Reporting Items for Systematic Reviews and Meta-Analyses: The PRISMA statement. *PLoS Medicine*, 6(6), e1000097. doi:10.1371/journal.pmed1000097

For more information, visit: [www.prisma-statement.org](http://www.prisma-statement.org).

Page 2 of 2

# BMJ Open

## Determining a safe upper limit of oxygen supplementation for adult patients: a systematic review

|                                 |                                                                                                                                                                                                                                                                                                                                                                                                          |
|---------------------------------|----------------------------------------------------------------------------------------------------------------------------------------------------------------------------------------------------------------------------------------------------------------------------------------------------------------------------------------------------------------------------------------------------------|
| Journal:                        | <i>BMJ Open</i>                                                                                                                                                                                                                                                                                                                                                                                          |
| Manuscript ID                   | bmjopen-2020-045057.R1                                                                                                                                                                                                                                                                                                                                                                                   |
| Article Type:                   | Original research                                                                                                                                                                                                                                                                                                                                                                                        |
| Date Submitted by the Author:   | 30-Mar-2021                                                                                                                                                                                                                                                                                                                                                                                              |
| Complete List of Authors:       | Lassen, Mathilde Languille; Rigshospitalet, Department of Anaesthesia, Centre of Head and Orthopaedics<br>Risgaard, Bjarke; Rigshospitalet, Department of Anaesthesia, Centre of Head and Orthopaedics<br>Baekgaard, Josefine; Rigshospitalet, Department of Anaesthesia, Centre of Head and Orthopaedics<br>Rasmussen, Lars; Rigshospitalet, Department of Anaesthesia, Centre of Head and Orthopaedics |
| <b>Primary Subject Heading</b>: | Anaesthesia                                                                                                                                                                                                                                                                                                                                                                                              |
| Secondary Subject Heading:      | Respiratory medicine                                                                                                                                                                                                                                                                                                                                                                                     |
| Keywords:                       | Adult anaesthesia < ANAESTHETICS, Adult intensive & critical care < INTENSIVE & CRITICAL CARE, RESPIRATORY MEDICINE (see Thoracic Medicine), Respiratory physiology < THORACIC MEDICINE, Adult intensive & critical care < ANAESTHETICS                                                                                                                                                                  |
|                                 |                                                                                                                                                                                                                                                                                                                                                                                                          |

SCHOLARONE™  
Manuscripts

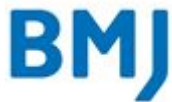

I, the Submitting Author has the right to grant and does grant on behalf of all authors of the Work (as defined in the below author licence), an exclusive licence and/or a non-exclusive licence for contributions from authors who are: i) UK Crown employees; ii) where BMJ has agreed a CC-BY licence shall apply, and/or iii) in accordance with the terms applicable for US Federal Government officers or employees acting as part of their official duties; on a worldwide, perpetual, irrevocable, royalty-free basis to BMJ Publishing Group Ltd ("BMJ") its licensees and where the relevant Journal is co-owned by BMJ to the co-owners of the Journal, to publish the Work in this journal and any other BMJ products and to exploit all rights, as set out in our [licence](#).

The Submitting Author accepts and understands that any supply made under these terms is made by BMJ to the Submitting Author unless you are acting as an employee on behalf of your employer or a postgraduate student of an affiliated institution which is paying any applicable article publishing charge ("APC") for Open Access articles. Where the Submitting Author wishes to make the Work available on an Open Access basis (and intends to pay the relevant APC), the terms of reuse of such Open Access shall be governed by a Creative Commons licence – details of these licences and which [Creative Commons](#) licence will apply to this Work are set out in our licence referred to above.

Other than as permitted in any relevant BMJ Author's Self Archiving Policies, I confirm this Work has not been accepted for publication elsewhere, is not being considered for publication elsewhere and does not duplicate material already published. I confirm all authors consent to publication of this Work and authorise the granting of this licence.

1  
2  
3  
4  
5 **Determining a safe upper limit of oxygen supplementation for adult**  
6 **patients: a systematic review**  
7  
8  
9

10  
11  
12  
13  
14  
15 Corresponding author:

16 Mathilde Languille Lassen

17 languillelassen@gmail.com

18 Department of Anesthesia, Centre of Head and Orthopedics, 4231 Rigshospitalet,  
19 University of Copenhagen, Denmark  
20  
21  
22  
23

24  
25 Bjarke Risgaard, MD, PhD

26 Department of Anesthesia, Centre of Head and Orthopedics, 4231 Rigshospitalet,  
27 University of Copenhagen, Denmark  
28  
29

30  
31  
32 Josefine S Bækgaard, MD, PhD

33 Department of Anesthesia, Centre of Head and Orthopedics, 4231 Rigshospitalet,  
34 University of Copenhagen, Denmark  
35  
36

37  
38  
39 Lars S Rasmussen, MD, PhD, DMSc

40 Department of Anesthesia, Centre of Head and Orthopedics, 4231 Rigshospitalet,  
41 University of Copenhagen, Denmark  
42  
43

44  
45  
46 Responsible department:

47 Department of Anesthesia, Centre of Head and Orthopedics, 4231 Rigshospitalet,  
48 University of Copenhagen, Denmark  
49  
50  
51  
52  
53  
54  
55  
56  
57  
58  
59  
60

## Abstract

**Objective:** This systematic review aimed to describe the connection between the inspired oxygen fraction and pulmonary complications in adult patients, with the objective of determining a safe upper limit of oxygen supplementation.

**Methods:** MEDLINE and Embase were systematically searched in August 2019 (updated July 2020) for studies fulfilling the following criteria: intubated adult patients (Population); high fractions of oxygen (Intervention) versus low fractions of (Comparison); atelectasis, acute respiratory distress syndrome (ARDS), pneumonia and/or duration of mechanical ventilation (Outcome); original studies both observational and interventional (Studies). Screening, data extraction and risk of bias assessment was done by two independent reviewers.

**Results:** Out of 6120 records assessed for eligibility, 12 were included. Seven studies were conducted in the emergency setting, and five studies included patients undergoing elective surgery. Eight studies reported data on atelectasis, two on ARDS, four on pneumonia and two on duration of mechanical ventilation. There was a nonsignificant increased risk of atelectasis if an oxygen fraction of 0.8 or above was used, Relative Risk (RR):1.37 [0.95, 1.96]. One study showed an almost three-fold higher risk of pneumonia in the high oxygen fraction group (RR 2.83 [2.25-3.56]). The two studies reporting ARDS and the two studies with data on mechanical ventilation showed no association with oxygen fraction. Four studies had a high risk of bias in one domain.

**Conclusions:** In this systematic review we found inadequate evidence to identify a safe upper dosage of oxygen, but the identified studies suggest a benefit of keeping inspiratory oxygen fraction below 0.8 with regards to formation of atelectases.

**PROSPERO registration number** CRD42020154242

### Strengths and limitations of this study

- The use of predefined Population, Intervention, Comparison, Outcome and Study design to assess studies for eligibility.
- The use of a wide search string in two databases.
- Two independent reviewers screening and including studies, assessing risk of bias and extracting data.
- There is a risk of publication bias that arises due to the possibility of missing unpublished studies.
- It is possible that our search did not identify all relevant studies.

1  
2  
3  
4  
5  
6  
7  
8  
9  
10  
11  
12  
13  
14  
15  
16  
17  
18  
19  
20  
21  
22  
23  
24  
25  
26  
27  
28  
29  
30  
31  
32  
33  
34  
35  
36  
37  
38  
39  
40  
41  
42  
43  
44  
45  
46  
47  
48  
49  
50  
51  
52  
53  
54  
55  
56  
57  
58  
59  
60

## Introduction

Oxygen is a molecule vital for life, as it is the cornerstone in cellular respiration in all aerobic organisms. In trauma care, during anesthesia and in the management of respiratory failure, an oxygen fraction of 0.21 may not be sufficient to maintain an acceptable oxygen concentration in arterial blood and oxygen supplementation is therefore often part of standard care (1,2).

Supplementary oxygen may result in hyperoxaemia, with the risk of tissue hyperoxia. An increasing amount of evidence has connected hyperoxia and hyperoxaemia with increased mortality (3–6) possibly as a consequence of a variety of factors associated with hyperoxia: atelectasis in the lungs (7,8), formation of reactive oxygen species (9), impairment of the innate immune system (10), as well as vasoconstriction with paradox tissue hypoxia to follow (11).

All in all, hypoxia should be avoided, but at the same time it seems that exposure to high concentrations of oxygen may have serious consequences. Therefore, it is relevant to investigate if a safe upper dosage of oxygen can be identified.

This systematic review aimed to describe the connection between the inspired oxygen fraction  $FiO_2$  and pulmonary complications in intubated adult patients, with the objective of determining a safe upper limit of oxygen supplementation. We defined pulmonary complications as atelectasis, pneumonia and acute respiratory distress syndrome (ARDS).

## Methods

### Protocol and registration

Methods of the analysis and inclusion criteria were prespecified and documented in a protocol. The protocol was completed following the Preferred Reporting Items for Systematic Reviews and Meta-Analysis guidelines for protocols (12) and was registered in PROSPERO, the international prospective register of systematic reviews (13) (CRD42020154242).

### Eligibility criteria

Studies were selected according to following predefined Population, Intervention, Comparison, Outcome and Study design (PICOS).

#### **Inclusion criteria:**

- **P**opulation: intubated patients  $\geq 18$  years



- **I**ntervention and **C**omparison: low inspiratory oxygen fraction (FiO<sub>2</sub>) (as defined by author) vs high FiO<sub>2</sub> (as defined by authors)
- **O**utcome: atelectasis, pneumonia, ARDS and duration of mechanical ventilation (as defined by authors)
- **S**tudy design: original studies both interventional and observational

#### **Exclusion criteria:**

- Hyperbaric oxygen treatment
- Case reports, review articles and editorials

We had no restrictions on year of publication. The search was restricted to studies published in French, English or Danish.

#### Information sources and search

We searched MEDLINE and Embase using the following predefined search string (presented search strategy is from MEDLINE).

1. (((((((oxygen [Title/Abstract]) OR oxygen[MeSH Terms]) OR hyperoxia[Title/Abstract]) OR "supplemental oxygen"[Title/Abstract]) OR "oxygen supplementation"[Title/Abstract]) OR fio2[Title/Abstract]))))
2. (((((((((((atelectasis[Title/Abstract]) OR pulmonary atelectasis[MeSH Terms]) OR pneumonia[Title/Abstract]) OR pneumonia[MeSH Terms]) OR "lung collapse"[Title/Abstract]) OR "collapsed lung"[Title/Abstract]) OR "acute lung injury"[Title/Abstract]) OR acute lung injury[MeSH Terms]) OR ARDS[Title/Abstract]) OR "acute respiratory distress syndrome"[Title/Abstract]) OR respiratory distress syndrome, adult[MeSH Terms]))))
3. (intub\*) OR "mechanical ventilation"
4. #1 AND #2 AND #3

The search was done the 6<sup>th</sup> of August 2019. The search was updated the 6<sup>th</sup> of July 2020.

Modifications were made to fit Embase.

We identified one additional record (14) by obtaining the full-text article of an abstract identified through the search string. Another record (15) was identified by screening the reference list of an article.

### Selection process

Two independent reviewers (MLL, BR) screened all titles and abstracts yielded by the search against the inclusion criteria using Covidence (an online program facilitating the production of systematic reviews developed by the Cochrane group) (16). A Cohen's Kappa for inter-rater reliability was calculated. The same reviewers obtained full text articles for all titles that appeared to meet the inclusion criteria or where there was any uncertainty. Disagreements were resolved through discussion until consensus. All full-text articles were assessed by the same two independent reviewers and those not meeting the inclusion criteria were excluded.

### Data collection and data items

Data extraction was done by two authors (MLL, BR), and was facilitated by the data-extraction tool Covidence and by using predefined forms. We collected study characteristics including trial design, trial size, country, period and year of publication. From the included studies we extracted the dosage of oxygen, type of control used, duration of treatment, patient characteristics (gender, age, patient type) as well as data on the predefined outcomes (atelectasis, pneumonia, ARDS) as defined by the authors.

### Risk of bias

Risk of bias for non-randomized studies were assessed by using the Newcastle Ottawa Scale (17). Here each study can be awarded from zero to nine stars, with zero stars representing a high risk of bias, and nine stars a low risk. Each study can be judged and awarded stars on eight items, categorized into three domains: selection of the study group, comparability of cohorts, and evaluation of the outcome of interest.

For randomized studies we used the Cochrane Collaboration tool for assessing risk of bias (Table 8.5.a in the Cochrane Handbook for Systematic Reviews of Intervention) in Covidence, which covers: sequence generation, allocation concealment, blinding, incomplete data and selective outcome reporting. A judgement as to the possible risk of bias on each domain were made from the extracted information, rated as "high risk", "low risk" or "unclear" risk of bias. These judgements were made based on the criteria for judging the risk of bias (Table 8.5.d in the Cochrane Handbook Higgins 2011).

## Summary measures and synthesis of results

This systematic review was expected to be a descriptive summary of the current evidence on oxygen supplementation and pulmonary complications. Relative risk was calculated where possible and a forest plot was used to illustrate the results. Relative risks with 95% confidence intervals, was calculated in studies where this information was missing and the calculation was possible. The forest plot was made with a random-effects model.

## Patient and Public Involvement

No patient involved

## Results

### Study selection

Our initial search strategy identified 7734 records. After duplicates were removed and two additional records from other sources were added, 6120 records were screened. Of these, 6100 were excluded as they did not fulfil eligibility criteria leaving 20 records for full-text screening. Cohen's kappa for inter-rater reliability of 0.43 (CI: 0.26 to 0.60) was calculated, which is judged to be moderate agreement. After full-text review, 12 records fulfilled the inclusion criteria (figure 1).

### Study characteristics

Study characteristics are summarized in table 1. Eight of the 12 included studies were randomized controlled trials. Among the four remaining there were two retrospective observational studies (18,19) and two prospective observational studies (20,21). About half of the studies were conducted in Europe. Seven studies were conducted in the acute care setting. Of these seven, one study (22) included patients with septic shock, four studies (14,18,21,23) recruited surgical, medical and trauma patients that were mechanically ventilated in the intensive care unit, one study (20) included patients with acute lung injury and the last study (24) recruited patients with traumatic brain injury. The remaining five studies included patients undergoing different types of elective surgery. The administered  $FiO_2$  varied substantially among the studies, with oxygen fraction ranging from 0.26 to 0.60 in the low  $FiO_2$  group and from 0.36 to 1.0 in the high  $FiO_2$  group.

Table 2 presents the outcomes of interest reported in the included studies. Eight studies reported on the incidence of atelectasis, two studies reported on ARDS, four studies reported on pneumonia and two studies reported on the duration of mechanical ventilation.

#### *Atelectasis*

The eight studies reporting on atelectasis, generally showed better outcomes for patients in the low  $FiO_2$  group, as two studies (22,25) showed almost two-fold higher risk of atelectasis in the high  $FiO_2$ , with RR: 1.875 [0.42-8.37] and RR: 2.0 [1.06-3.79], respectively. One study (15) suggested a minor benefit of treatment with low  $FiO_2$ , but this was not statistically significant, RR: 1.46 [0.97-2.20]. Another study (24) found RR: 0.91 [0.56-1.50] suggesting a benefit of treatment with high  $FiO_2$ , but this was not statistically significant. These studies are illustrated in the forest plot (figure 2), which shows that in general treatment with high  $FiO_2$  was associated with higher risk of atelectasis formation, RR:1.37 [0.95, 1.96]. The heterogeneity ( $I^2$ ) of the meta-analysis presented in

figure 2 is 31%, which corresponds to a moderate heterogeneity (Cochrane Handbook for Systematic Reviews of Intervention, section 9.5.2 Identifying and measuring heterogeneity). *Rothen et al* (8) found a 16.8 times greater area of atelectasis in the high FiO<sub>2</sub> group and similarly, the study by *Benoit et al* (26) found a three-fold larger atelectatic surface in the high FiO<sub>2</sub> group. *Suzuki et al* (21) estimated atelectasis as time weighted averages, and also found a beneficial effect of a low FiO<sub>2</sub>. In the study by *Ishii et al* (18) additional information on intubated patients were found in an abstract (27) from the same study. They found a higher incidence of atelectasis in the high FiO<sub>2</sub> group, but the total number of patients was not reported.

#### ARDS

*Panwar et al* (14) showed an increase of new-onset ARDS in the low FiO<sub>2</sub> group, RR: 0.87 (0.43-1.75), but this was not statistically significant. The study by *Lång et al* (24) found three patients with ARDS in the low FiO<sub>2</sub> group, while no patients with ARDS were identified in the group receiving high FiO<sub>2</sub>.

#### Pneumonia

The study by *Staeher-Rye et al* (19) showed a significant increase in the incidence of pneumonia, RR: 2.83 [2.25-3.56] in the high FiO<sub>2</sub> group. Similarly, *Barrot et al* (23) showed a small, but nonsignificant, tendency to ventilator-associated pneumonias in the high FiO<sub>2</sub> group, RR: 1.26 [0.71-2.22]. The two other studies, *Asfar et al* (22) and *Lång et al* (24), found a nonsignificant tendency for pneumonia in the low FiO<sub>2</sub> group with RR: 0.94 [0.59-1.49] and RR: 0.71 [0.26-1.97], respectively. These studies are illustrated in the forest plot (figure 3), which shows a non-significant tendency that treatment with high FiO<sub>2</sub> was associated with higher risk of pneumonia, RR: 1.32 [0.65, 2.70].

#### Duration of mechanical ventilation

The two studies reporting the duration of mechanical ventilation pointed in opposite direction. *Lång et al* (24) reported slightly more time spent on mechanical ventilation in the low FiO<sub>2</sub> group, while *Rachmale et al* (20) reported a two-fold increase in time in the high FiO<sub>2</sub> group.

#### Risk of bias assessment

Risk of bias for randomized studies are illustrated in table 3. Three studies had no blinding of participants, personal, or outcome assessment, leaving them with a high risk of bias on these domains (8,14,22). In the study by *Rothen et al* (8) it was unclear if a randomization was performed between the low FiO<sub>2</sub> group and the high FiO<sub>2</sub> group, indicating a high risk of bias.

1  
2  
3  
4 *Lång et al* (24) was an open-label trial, and was therefore awarded a high risk of bias on the domain  
5 of blinding of participants and personnel, however the outcome assessor was blinded.

6  
7 The four non-randomized studies were assessed using the New-Castle Ottawa Scale (17). One study  
8 (20) scored six stars, two studies (18,19) scored seven stars and one study (21) scored 8 stars,  
9 indicating an overall high quality of the studies.  
10  
11  
12  
13  
14

## 15 Discussion

### 16 *Summary of findings*

17  
18 In this study we were not able to determine a safe upper limit of oxygen supplementation, due to  
19 inadequate evidence and heterogeneity as the included studies had different endpoints with varying  
20 definitions, and also different ways of defining low and high FiO<sub>2</sub>. In some studies the oxygen  
21 fraction in the low FiO<sub>2</sub> group was higher than in the high FiO<sub>2</sub> group in other studies.  
22  
23  
24  
25  
26

27 Regarding atelectasis, seven of the eight studies favored a conservative oxygen strategy with low  
28 FiO<sub>2</sub> and an FiO<sub>2</sub> above 0.8 seemed to be associated with higher risk of atelectasis formation.  
29  
30  
31

### 32 *Strengths and limitations*

33  
34 This study was conducted according to the PRISMA guidelines (28), ensuring a systematic and  
35 broadly acknowledged approach to the present literature. The strengths of this approach include  
36 predefined PICOS criteria to assess study eligibility, use of a wide search string in two databases,  
37 and two independent reviewers screened and assessed studies, including risk of bias.  
38  
39  
40

41 Our study is limited by general weaknesses of systematic reviews. This includes risk of publication  
42 bias that arises due to the possibility of missing nonpublished studies. Despite the systematic search  
43 with predefined search string, and screening of reference lists of included studies, there is always a  
44 possibility that our search did not identify all relevant studies. However, the heterogeneity of the 12  
45 studies reviewed makes us believe that potentially missed studies would not change the conclusion  
46 substantially. The patient population was determined in very broad terms (intubated adult patients),  
47 resulting in more heterogeneity among the included studies.  
48  
49  
50  
51  
52

53 The trials varied in patient groups, associated clinical care and disease severity. Furthermore, in  
54 some studies it is unclear when exactly the outcome of interest was measured (early or late onset of  
55 ARDS and timing of CT/X-ray for measuring the presence of atelectasis). It is also unclear how  
56  
57  
58  
59  
60

1  
2  
3  
4 pneumonia was defined in the four studies reporting this outcome. Therefore conclusions should be  
5 drawn with caution.  
6

7 Half of the randomized controlled trials were not blinded to personnel and participants, increasing  
8 the risk of performance bias. Three of these were not blinded to outcome assessors which increase  
9 the risk of detection bias. In general, many of the studies are relatively small, increasing the risk of  
10 other bias such as publication bias (table 3).  
11  
12  
13  
14

15  
16 Atelectasis was defined in different ways complicating the pooling of data and the possibility to  
17 undertake a meta-analysis. Three studies (8,15,25) used CT-scans and they all considered densities  
18 between -100 to +100 Hounsfield as atelectasis. Of these three, one (8) measured areas of  
19 atelectasis in cm<sup>2</sup> whereas the two others (15,25) measured if atelectases were present or not. *Ishii*  
20 *et al* (18) also used CT-scans, but defined atelectases as areas with formation of more than 10 mm  
21 thick atelectasis from the first to the second scan. The study by *Staeher et al* (25) did not define  
22 specific criteria on when densities were judged as atelectasis or not.  
23  
24

25  
26 *Asfar et al* (22) and *Suzuki et al* (21) used chest x-rays, without defining atelectasis specifically, as  
27 this was decided by the individual physician. *Lång et al* (24) used chest x-rays in the same manner,  
28 however they allowed the appliance of positive end-expiratory pressure to minimize atelectasis,  
29 which makes it hard to directly compare results with other studies. Only *Suzuki et al* (21) used more  
30 than one radiologist to perform the outcome assessment.  
31  
32  
33  
34  
35  
36  
37

38  
39 In *Panwar et al* (14), new-onset ARDS was defined as subsequent occurrence of ARDS in those  
40 patients who did not have ARDS on day 0, and where ARDS was present according to the Berlin  
41 definition (29). *Lång et al* (24) did not report their definition of ARDS.  
42  
43  
44

45  
46 Regarding pneumonia, the database study of 26841 patients performed by *Staeher-Rye et al* (19)  
47 found a significant, almost three-fold higher risk of pneumonia in the liberal oxygen group,  
48 indicating that excess levels of oxygen may be harmful. However, this is an analysis of  
49 administrative data, with risk of misclassification bias and therefore direct conclusions should be  
50 drawn with caution.  
51  
52  
53  
54

#### 55 56 *Other reviews*

57  
58 The evidence for the use of supplemental oxygen has been investigated in recently published  
59  
60



1  
2  
3  
4 systematic reviews. A systematic review and meta-analysis by *Damiani et al* (30) from 2014  
5 suggests an association between hyperoxia and mortality in patients with stroke, traumatic brain  
6 injury and those resuscitated from cardiac arrest. However, they concluded that their results were  
7 limited by the heterogeneity of the included studies. The same conclusion was drawn in another  
8 meta-analysis from 2015 by *Helmerhorst et al* (31). No definite conclusions could be made due to  
9 heterogeneity in the included studies; however the meta-analysis suggested a benefit of conservative  
10 oxygen therapy. In a Cochrane review from 2015 by *Wetterslev et al* (32), comparing low (FiO<sub>2</sub>  
11 0.30-0.40) vs high (FiO<sub>2</sub> 0.60-0.90) perioperative inspiratory oxygen fractions, they found no  
12 association between perioperative FiO<sub>2</sub> and postoperative surgical site infection and mortality. In  
13 another Cochrane review from 2016 performed by *Cabello et al* (33), they focused on patients with  
14 acute myocardial infarctions. They included five studies and found no clear recommendations on  
15 the use of oxygen supplementation.

16  
17  
18 In a recent meta-analysis performed in 2018 by *Chu et al* (4) they included 25 randomised  
19 controlled trials on acutely ill patients and found a significant association between liberal  
20 oxygenation strategies and increased mortality in-hospital, at 30 days and at longest follow-up.  
21 Nevertheless, morbidity outcomes were similar between groups.

22  
23  
24 The available reviews are limited because of heterogeneity, including different outcome measures,  
25 overall indicate that excess oxygen is harmful, stressing the need for further investigation on this  
26 subject.

27  
28  
29 Oxygen supplementation is obviously a vital part of trauma care, practice of anaesthesia, the  
30 management of respiratory distress, and treatment of a variety of other conditions. However,  
31 supplemental oxygen should be carefully considered a drug and prescribed adequately. There is a  
32 general lack of strong evidence for supplemental oxygen, and an upper limit of oxygen  
33 supplementation is not included in many guidelines (1, 34-36). Our study contributes to the current  
34 evidence in a different way, by looking at the association between FiO<sub>2</sub> and pulmonary  
35 complications, which is a highly relevant indicator in the search for a safe upper limit of oxygen  
36 supplementation.

37  
38  
39 As oxygen supplementation is so widely used, it is crucial that better evidence-based guidelines are  
40 developed. Future research is required to precisely define the oxygen therapy strategies to maximize  
41 benefits and minimize harms.



## Conclusion

In this systematic review we found that there was inadequate evidence to identify a safer upper dosage of oxygen, but the identified studies suggest a benefit of conservative oxygen therapy, defined as  $FiO_2 \leq 0.8$  with regards to formation of atelectasis.

For peer review only

1  
2  
3  
4 Figure caption  
5

6 **Figure 1:** Preferred Reporting Items for Systematic Reviews and Meta-analysis (PRISMA) flow  
7 diagram of identification, screening, eligibility and inclusion process (28) on a search for studies  
8 comparing low dose oxygen supplementation with high dose oxygen supplementation with  
9 pulmonary complications as an outcome.  
10  
11

12  
13 **Figure 2:** Forest plot of formation of atelectasis in studies comparing low  $\text{FiO}_2$  with high  $\text{FiO}_2$ .  
14

15  
16 **Figure 3:** Forest plot of risk of pneumonia in studies comparing low  $\text{FiO}_2$  with high  $\text{FiO}_2$ .  
17  
18  
19  
20  
21  
22  
23  
24  
25  
26  
27  
28  
29  
30  
31  
32  
33  
34  
35  
36  
37  
38  
39  
40  
41  
42  
43  
44  
45  
46  
47  
48  
49  
50  
51  
52  
53  
54  
55  
56  
57  
58  
59  
60

## Ethics approval

Ethics approval was not required as this was a systematic review with no involvement of humans or animals.

## Contributorship statement

The idea for the article was formed by LSR. Literature search was performed by MLL and BR. MLL wrote the article. JSB contributed with high subject knowledge and all authors gave substantial contributions to the work. Every author revised the work critically for important intellectual content. Every author made a final approval of the version to be published. Every author agree to be accountable for all aspects of the work.

## Funding

Departmental funding. Award/Grant number is not applicable.

## Competing interests

None declared.

## Data sharing statement

This was a systematic review and researchers can contact the authors to access the material.

## References

1. O'Driscoll BR, Howard LS, Earis J et al. British Thoracic Society Guideline for oxygen use in adults in healthcare and emergency settings. *BMJ Open Respir Res.* 2017;4(1):1–20.
2. Thim T, Vinther NH, Grove EL et al. Initial assessment and treatment with the Airway, Breathing, Circulation, Disability, Exposure (ABCDE) approach. *Int J Gen Med.* 2012;117–21.
3. Brenner M, Stein D, Hu P et al. Association between early hyperoxia and worse outcomes after traumatic brain injury. *Arch Surg.* 2012;147(11):1042–6.
4. Chu DK, Kim LHY, Young PJ et al. Mortality and morbidity in acutely ill adults treated with liberal versus conservative oxygen therapy (IOTA): a systematic review and meta-analysis. *Lancet* 2018;391(10131):1693–705.
5. Wang CH, Chang WT, Huang CH et al. The effect of hyperoxia on survival following adult cardiac arrest: a systematic review and meta-analysis of observational studies. *Resuscitation* 2014;85:1142–8
6. Girardis M, Busani S, Damiani E et al. Effect of conservative vs conventional oxygen therapy on mortality among patients in an intensive care unit the oxygen-ICU randomized clinical trial. *JAMA* 2016;316(15):1583–9
7. Aboab J, Jonson B, Kouatchet A et al. Effect of inspired oxygen fraction on alveolar derecruitment in acute respiratory distress syndrome. *Intensive Care Med.* 2006 Dec;32(12):1979–86.
8. Rothen HU, Sporre B, Engberg G et al. Prevention of atelectasis during general anaesthesia. *Lancet.* 1995;345(8962):1387–91
9. Turrens JF. Mitochondrial formation of reactive oxygen species. *J Physiol.* 2003;2:335–44
10. Baleeiro CEO, Wilcoxon SE, Morris SB et al. Sublethal Hyperoxia Impairs Pulmonary Innate Immunity. *J Immunol.* 2003;171:955–63.
11. Ariyaratnam P, Loubani M, Bennett R et al. Hyperoxic Vasoconstriction of Human Pulmonary Arteries: A Novel Insight into Acute Ventricular Septal Defects. *Hindawi ISRN Cardiology.* 2013;685735
12. Shamseer L, Moher D, Clarke M et al. Preferred reporting items for systematic review and meta-analysis protocols (prisma-p) 2015: Elaboration and explanation. *BMJ* 2015;349(December 2014):1–25.

- 1  
2  
3  
4 13. PROSPERO. International prospective register of systematic reviews.  
5  
6 <https://www.crd.york.ac.uk/prospero/>  
7
- 8 14. Panwar R, Hardie M, Bellomo R et al. Conservative versus liberal oxygenation targets for  
9 mechanically ventilated patients: A pilot multicenter randomized controlled trial. *Am J*  
10 *Respir Crit Care Med*. 2016;193(1):43–51.  
11
- 12 15. Akça O, Podolsky A, Eisenhuber E et al. Comparable postoperative pulmonary atelectasis in  
13 patients given 30% or 80% oxygen during and 2 hours after colon resection.  
14 *Anesthesiology*. 1999;91(4):991–8.  
15
- 16 16. Covidence systematic review software. Veritas Health Innovation. Melbourne.  
17 [www.covidence.org](http://www.covidence.org).  
18
- 19 17. Wells GA, Shea B, O'Connell D et al. The Newcastle-Ottawa Scale (NOS) for assessing the  
20 quality of nonrandomized studies in meta-analyses. *Evidence-based Public Health* 2012.  
21 [http://www.evidencebasedpublichealth.de/download/Newcastle\\_Ottawa\\_Scale\\_Pope\\_Bruce](http://www.evidencebasedpublichealth.de/download/Newcastle_Ottawa_Scale_Pope_Bruce.pdf)  
22 [.pdf](http://www.evidencebasedpublichealth.de/download/Newcastle_Ottawa_Scale_Pope_Bruce.pdf)  
23
- 24 18. Ishii K, Morimatsu H, Ono K et al. Relationship between a High-inspired Oxygen  
25 Concentration and Dorsal Atelectasis in High-energy Trauma Patients. *Acta Med. Okayama*  
26 2020;74(1):17-26  
27
- 28 19. Staehr-Rye A, Meyhoff CS, Scheffebichler F et al. High intraoperative inspiratory oxygen  
29 fraction and risk of major respiratory complications. *Br J Anaesth* 2017;119(1):140–9.  
30
- 31 20. Rachmale S, Li G, Wilson G et al. Practice of excessive FIO2 and effect on pulmonary  
32 outcomes in mechanically ventilated patients with acute lung injury. *Respir Care*.  
33 2012;57(11):1887–93  
34
- 35 21. Suzuki S, Eastwood GM, Goodwin MD et al. Atelectasis and mechanical ventilation mode  
36 during conservative oxygen therapy: A before-and-after study. *J Crit Care* 2015;30(6):1232–  
37 7  
38
- 39 22. Asfar P, Schortgen F, Boissramé-Helms J et al. Hyperoxia and hypertonic saline in patients  
40 with septic shock (HYPER2S): a two-by-two factorial, multicentre, randomised, clinical  
41 trial. *Lancet Respir Med*. 2017;5(3):180–90  
42
- 43 23. Barrot L, Asfar P, Mauny F et al. Liberal or Conservative Oxygen Therapy for Acute  
44 Respiratory Distress Syndrome. *N Engl J Med* 2020;382:999-1008  
45
- 46 24. Lång M, Skrifvars MB, Siironen J et al. A pilot study of hyperoxemia on neurological  
47 injury, inflammation and oxidative stress. *Acta Anaesthesiol Scand*. 2018;62(6):801–10  
48  
49  
50  
51  
52  
53  
54  
55  
56  
57  
58  
59  
60

- 1
- 2
- 3
- 4 25. Staehr AK, Meyhoff CS, Henneberg SW et al. Influence of perioperative oxygen fraction on
- 5 pulmonary function after abdominal surgery: A randomized controlled trial. *BMC Res*
- 6 *Notes*. 2012; 5:383
- 7
- 8
- 9 26. Benoît Z, Wicky S, Fischer JF et al. The Effect of Increased FIO<sub>2</sub> Before Tracheal
- 10 Extubation on Postoperative Atelectasis. *Anesth Analg* 2002;95:1777–81
- 11
- 12 27. Ishii K, Morimatsu H, Ono K et al. Relationship between a high inspired oxygen
- 13 concentration and a gravity dependent atelectasis in trauma patients: a subgroup analysis.
- 14 2015 Annu Meet Int Anesth Res Soc IARS 2015 Honolulu, HI United States 2015;120(3
- 15 SUPPL. 1):S109
- 16
- 17
- 18
- 19 28. Moher D, Liberati A, Tetzlaff J et al. Preferred reporting items for systematic reviews and
- 20 meta-analyses: the PRISMA statement. *Int J Surg* 2010;8(8):658
- 21
- 22 29. Rawal G, Yadav S, Kumar R. Acute respiratory distress syndrome: An update and review. *J*
- 23 *Transl Intern Med*. 2016;6(2):74–7.
- 24
- 25 30. Damiani E, Adrario E, Girardis M et al. Arterial hyperoxia and mortality in critically ill
- 26 patients: A systematic review and meta-analysis. *Crit Care* 2014;18(1).
- 27
- 28 31. Helmerhorst HJF, Roos-Blom MJ, Van Westerloo DJ et al. Association between arterial
- 29 hyperoxia and outcome in subsets of critical illness: A systematic review, meta-analysis, and
- 30 meta-regression of cohort studies. *Crit Care Med* 2015;43(7):1508–19
- 31
- 32 32. Wetterslev J, Meyhoff CS, Jørgensen LN et al. The effects of high perioperative inspiratory
- 33 oxygen fraction for adult surgical patients. *Cochrane Database Syst Rev* 2015(6):CD008884.
- 34
- 35 33. Cabello JB, Burls A, Emparanza JI et al. Oxygen therapy for acute myocardial infarction.
- 36 *Cochrane Database Syst Rev* 2016(12): CD007160.
- 37
- 38 34. Casaubon LK, Boulanger JM, Blacquièrè D et al. Canadian Stroke Best Practice
- 39 Recommendations: Hyperacute Stroke Care Guidelines, Update 2015. *Int J Stroke*.
- 40 2015;10(6):924–40
- 41
- 42 35. Nikolaou NI, Welsford M, Beygui F et al. Part 5: Acute coronary syndromes. 2015
- 43 International Consensus on Cardiopulmonary Resuscitation and Emergency Cardiovascular
- 44 Care Science with Treatment Recommendations. *Resuscitation*. 2015;95(2015):e121–46
- 45
- 46 36. Moga C, Chojecki D. Oxygen therapy in acute care settings. Institute of Health Economics
- 47 2016. <https://www.ihe.ca/publications/oxygen-therapy-in-acute-care-settings>
- 48
- 49
- 50
- 51
- 52
- 53
- 54
- 55
- 56
- 57
- 58
- 59
- 60

**Table 1: Characteristics of studies comparing low FiO<sub>2</sub> with high FiO<sub>2</sub>, with lung complications as an outcome. Lung complications were atelectasis, ARDS, pneumonia and duration of mechanical ventilation.**

| Reference and year of publication | Country                | Setting                       | Study design                     | Sample size | Low dose oxygen                     | High dose oxygen       | Primary outcome                                                                                        |
|-----------------------------------|------------------------|-------------------------------|----------------------------------|-------------|-------------------------------------|------------------------|--------------------------------------------------------------------------------------------------------|
| Akca et al (1999) (15)            | Austria                | Elective surgery              | Randomized controlled trial      | 30          | 0.3                                 | 0.8                    | Atelectasis                                                                                            |
| Asfar et al (2017) (22)           | France                 | Septic shock                  | Randomized controlled trial      | 434         | SpO <sub>2</sub> between 88 and 95% | 1.0                    | Mortality day-28                                                                                       |
| Barrot et al (2020) (23)          | France                 | Critical care                 | Randomized controlled trial      | 205         | SpO <sub>2</sub> between 88 and 92% | SpO <sub>2</sub> ≥ 96% | Mortality day-28                                                                                       |
| Benoît et al (2002) (26)          | Switzerland            | Elective surgery              | Randomized controlled trial      | 20          | 0.4                                 | 1.0                    | Atelectasis                                                                                            |
| Ishii et al (2015) (18)           | Japan                  | Trauma                        | Retrospective cohort study       | 911         | < 0.6                               | > 0.6                  | Atelectasis                                                                                            |
| Lång et al (2018) (24)            | Finland                | Critical care                 | Randomized controlled trial      | 65          | 0.4                                 | 0.7                    | Levels of ROS, IL-6 and NSE                                                                            |
| Panwar et al (2015) (14)          | Australia, NZ & France | Critical care                 | Randomized controlled trial      | 104         | Mean = 0.26                         | Mean = 0.36            | Mean AUC for SpO <sub>2</sub> , SaO <sub>2</sub> , PaO <sub>2</sub> , and FIO <sub>2</sub> on days 0–7 |
| Rachmale et al (2012) (20)        | USA                    | Critical care                 | Prospective, observational study | 210         | Mean = 0.4                          | Mean = 0.6             | Duration of exposure to excessive FiO <sub>2</sub> during the first 48 h of mechanical ventilation     |
| Rothen et al (1995) (8)           | Sweden                 | Elective surgery              | Randomized controlled trial      | 24          | 0.3                                 | 1.0                    | Atelectasis                                                                                            |
| Staehr et al (2012) (25)          | Denmark                | Laparotomy for ovarian cancer | Randomized controlled trial      | 35          | 0.3                                 | 0.8                    | Change in PaO <sub>2</sub> /FiO <sub>2</sub>                                                           |

1  
2  
3  
4  
5  
6  
7  
8  
9  
10  
11  
12  
13  
14  
15  
16  
17  
18  
19  
20  
21  
22  
23  
24  
25  
26  
27  
28  
29  
30  
31  
32  
33  
34  
35  
36  
37  
38  
39  
40  
41  
42  
43  
44  
45  
46  
47  
48  
49  
50  
51  
52  
53  
54  
55  
56  
57  
58  
59  
60

|                              |           |                            |                                    |       |      |      |                                 |
|------------------------------|-----------|----------------------------|------------------------------------|-------|------|------|---------------------------------|
| Staehr-Rye et al (2017) (19) | USA       | Non-cardiothoracic surgery | Register study                     | 26841 | 0.31 | 0.79 | Major respiratory complications |
| Suzuki et al (2015) (21)     | Australia | Critical care              | Prospective before-and-after study | 105   | 0.27 | 0.40 | Changes in atelectasis score    |

Abbreviations: AUC: area under the curve

For peer review only



**Table 2: Patient outcomes comparing low doses of oxygen supplementation with high doses of oxygen supplementation**

| Reference                          | Low dose oxygen            | High dose oxygen          | RR (95% CI)      |
|------------------------------------|----------------------------|---------------------------|------------------|
| Atelectasis                        |                            |                           |                  |
| Akca et al (15)                    | 9 (64%)                    | 15 (94%)                  | 1.46 (0.97-2.2)  |
| Asfar et al (22)                   | 13 (6%)                    | 26 (12%)                  | 2.0 (1.06-3.79)  |
| Benoit et al (26)                  | 2.5% of total surface      | 7% of total surface       | -                |
| Ishii et al (18)                   | 64% of patients            | 76.8% of patients         | -                |
| Lång et al (24)                    | 14 (52%)                   | 18 (47%)                  | 0.914 (0.56-1.5) |
| Rothen et al (8)                   | 0.25 cm <sup>2</sup> ± 0.4 | 4.2 cm <sup>2</sup> ± 5.6 | -                |
| Staehr et al (25)                  | 2 (13.3%)                  | 5 (25%)                   | 1.88 (0.42-8.37) |
| Suzuki et al (21)                  | TWA AS = 1.5 (0.7-2)       | TWA AS = 2 (1.2-2.2)      | -                |
| ARDS                               |                            |                           |                  |
| Lång et al (24)                    | 3 (11%)                    | 0 (0%)                    | -                |
| Panwar et al (14)                  | 11 (32%)                   | 11 (28%)                  | 0.87 (0.43-1.75) |
| Pneumonia                          |                            |                           |                  |
| Asfar et al (22)                   | 32 (15%)                   | 30 (14%)                  | 0.94 (0.59-1.49) |
| Barrot et al (23)                  | 17 (17.2%)                 | 22 (21.6%)                | 1.26 (0.71-2.22) |
| Lång et al (24)                    | 6 (22.2%)                  | 6 (15.8%)                 | 0.71 (0.26-1.97) |
| Staehr-Rye et al (19)              | 104 (0.7%)                 | 227 (1.9%)                | 2.83 (2.25-3.56) |
| Duration of mechanical ventilation |                            |                           |                  |
| Lång et al (24)                    | 6.3 days (4.7-10)          | 5 days (2.5-7.5)          | -                |
| Rachmale et al (20)                | 2.8 days (1-6)             | 6 days (3-10.5)           | -                |

Continuous data is presented as mean (SD) or median (IQR). Relative risk (RR) is presented with high dose oxygen in the numerator. Abbreviations: RR: relative risk, CI: confidence interval, TWA AS: time weighted average atelectasis, SD: standard deviation, IQR: interquartile range

**Table 3: Risk of bias assessment for randomized controlled trials comparing low dose oxygen supplementation with high dose oxygen supplementation. Risk of bias was assessed using Cochrane Collaboration tool for assessing risk of bias (Table 8.5.a in the Cochrane Handbook for Systematic Reviews of Intervention).**

|                                       | Akca et al                                                                          | Asfar et al                                                                         | Barrot et al                                                                        | Benoi t et al                                                                       | Lång et al                                                                          | Panw ar et al                                                                        | Rothe n et al                                                                         | Staehr et al                                                                          |
|---------------------------------------|-------------------------------------------------------------------------------------|-------------------------------------------------------------------------------------|-------------------------------------------------------------------------------------|-------------------------------------------------------------------------------------|-------------------------------------------------------------------------------------|--------------------------------------------------------------------------------------|---------------------------------------------------------------------------------------|---------------------------------------------------------------------------------------|
| Random sequence generation            |    |    |    |    |    |    |    |    |
| Allocation concealment                |    |    |    |    |    |    |    |    |
| Blinding of participants and personal |    |    |    |    |    |    |    |    |
| Blinding of outcome assessment        |    |    |    |    |    |    |    |    |
| Incomplete outcome data               |   |   |   |   |   |   |   |   |
| Selective reporting                   |  |  |  |  |  |  |  |  |
| Other bias                            |  |                                                                                     |                                                                                     |  |                                                                                     |  |                                                                                       |  |

Green = low risk of bias, yellow = unclear risk of bias, red = high risk of bias

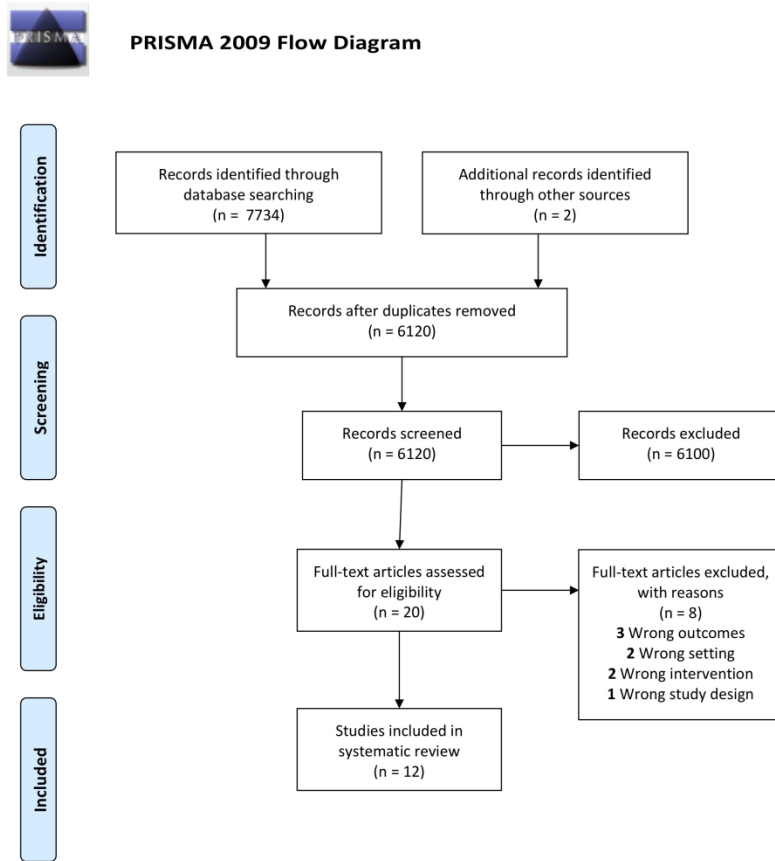

From: Moher D, Liberati A, Tetzlaff J, Altman DG, The PRISMA Group (2009). Preferred Reporting Items for Systematic Reviews and Meta-Analyses: The PRISMA Statement. PLoS Med 6(6): e1000097. doi:10.1371/journal.pmed1000097

For more information, visit [www.prisma-statement.org](http://www.prisma-statement.org).

**Figure 1:** Preferred Reporting Items for Systematic Reviews and Meta-analysis (PRISMA) flow diagram of identification, screening, eligibility and inclusion process (28) on a search for studies comparing low dose oxygen supplementation with high dose oxygen supplementation with pulmonary complications as an outcome.

215x279mm (300 x 300 DPI)

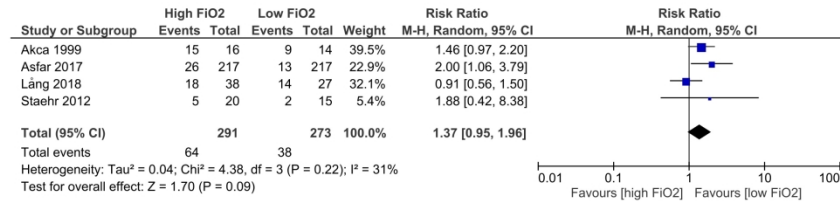

**Figure 2:** Forest plot of formation of atelectasis in studies comparing low FIO2 with high FIO2.

209x278mm (300 x 300 DPI)

1  
2  
3  
4  
5  
6  
7  
8  
9  
10  
11  
12  
13  
14  
15  
16  
17  
18  
19  
20  
21  
22  
23  
24  
25  
26  
27  
28  
29  
30  
31  
32  
33  
34  
35  
36  
37  
38  
39  
40  
41  
42  
43  
44  
45  
46  
47  
48  
49  
50  
51  
52  
53  
54  
55  
56  
57  
58  
59  
60

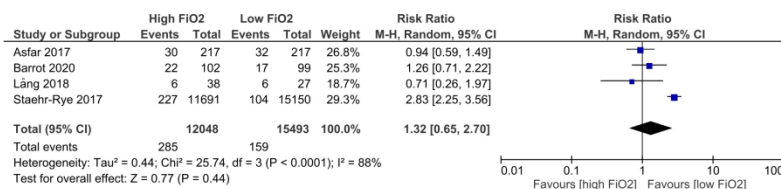

**Figure 3:** Forest plot of risk of pneumonia in studies comparing low FIO2 with high FIO2.

209x297mm (300 x 300 DPI)

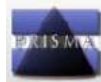

# PRISMA 2009 Checklist (Adapted for KIN 4400)

Page 1 of 2

| Section/topic                      | #  | Checklist item                                                                                                                                                                                                                                                       | Reported on page # |
|------------------------------------|----|----------------------------------------------------------------------------------------------------------------------------------------------------------------------------------------------------------------------------------------------------------------------|--------------------|
| <b>TITLE</b>                       |    |                                                                                                                                                                                                                                                                      |                    |
| Title                              | 1  | Identify the report as a literature review.                                                                                                                                                                                                                          | 1                  |
| <b>ABSTRACT</b>                    |    |                                                                                                                                                                                                                                                                      |                    |
| Structured summary                 | 2  | Provide a structured summary including, as applicable: background; objectives; data sources; study eligibility criteria, participants, and interventions; study appraisal and synthesis methods; results; limitations; conclusions and implications of key findings; | 2                  |
| <b>INTRODUCTION</b>                |    |                                                                                                                                                                                                                                                                      |                    |
| Rationale                          | 3  | Describe the rationale for the review in the context of what is already known about your topic.                                                                                                                                                                      | 4                  |
| Objectives                         | 4  | Provide an explicit statement of questions being addressed with reference to participants, interventions, comparisons, outcomes, and study design (PICOS).                                                                                                           | 4                  |
| <b>METHODS</b>                     |    |                                                                                                                                                                                                                                                                      |                    |
| Eligibility criteria               | 5  | Specify study characteristics (e.g., PICOS, length of follow-up) and report characteristics (e.g., years considered, language, publication status) used as criteria for eligibility, giving rationale.                                                               | 4                  |
| Information sources                | 6  | Describe all information sources (e.g., databases with dates of coverage) in the search and date last searched.                                                                                                                                                      | 5                  |
| Search                             | 7  | Present full electronic search strategy for at least one database, including any limits used, such that it could be repeated.                                                                                                                                        | 5                  |
| Study selection                    | 8  | State the process for selecting studies (i.e., screening, eligibility).                                                                                                                                                                                              | 6                  |
| Risk of bias in individual studies | 9  | Describe methods used for assessing risk of bias of individual studies (including specification of whether this was done at the study or outcome level).                                                                                                             | 6                  |
| Risk of bias across studies        | 10 | Specify any assessment of risk of bias that may affect the cumulative evidence (e.g., publication bias, selective reporting within studies).                                                                                                                         | 6                  |
| <b>RESULTS</b>                     |    |                                                                                                                                                                                                                                                                      |                    |
| Study selection                    | 11 | Give numbers of studies screened, assessed for eligibility, and included in the review, with reasons for exclusions at each stage, ideally with a flow diagram.                                                                                                      | 8                  |
| Study characteristics              | 12 | For each study, present characteristics for which data were extracted (e.g., study size, PICOS, follow-up period) and provide the citations.                                                                                                                         | 8                  |



## PRISMA 2009 Checklist (Adapted for KIN 4400)

| Section/topic                              | #  | Checklist item                                                                                                                                                                                                                            | Reported on page # |
|--------------------------------------------|----|-------------------------------------------------------------------------------------------------------------------------------------------------------------------------------------------------------------------------------------------|--------------------|
| Synthesis of results of individual studies | 13 | For all outcomes considered (benefits or harms), present, for each study: (a) summary of results and (b) relationship to other studies under review (e.g. agreements or disagreements in methods, sampling, data collection or findings). | 8                  |
| <b>DISCUSSION</b>                          |    |                                                                                                                                                                                                                                           |                    |
| Summary of evidence                        | 14 | Summarize the main findings including the strength of evidence for each main outcome; consider their relevance to key groups (e.g., healthcare providers, users, and policy makers).                                                      | 10                 |
| Limitations                                | 15 | Discuss limitations at study and outcome level (e.g., risk of bias), and at review-level (e.g., incomplete retrieval of identified research, reporting bias).                                                                             | 10                 |
| <b>CONCLUSION</b>                          |    |                                                                                                                                                                                                                                           |                    |
| Conclusions                                | 16 | Provide a general interpretation of the results in the context of other evidence, and implications for future research.                                                                                                                   | 13                 |

Adapted from: Moher D, Liberati A, Tetzlaff J, Altman DG, The PRISMA Group (2009). Preferred Reporting Items for Systematic Reviews and Meta-Analyses: The PRISMA statement. *PLoS Medicine*, 6(6), e1000097. doi:10.1371/journal.pmed1000097

For more information, visit: [www.prisma-statement.org](http://www.prisma-statement.org).

Page 2 of 2

# BMJ Open

## Determining a safe upper limit of oxygen supplementation for adult patients: a systematic review

|                                 |                                                                                                                                                                                                                                                                                                                                                                                                          |
|---------------------------------|----------------------------------------------------------------------------------------------------------------------------------------------------------------------------------------------------------------------------------------------------------------------------------------------------------------------------------------------------------------------------------------------------------|
| Journal:                        | <i>BMJ Open</i>                                                                                                                                                                                                                                                                                                                                                                                          |
| Manuscript ID                   | bmjopen-2020-045057.R2                                                                                                                                                                                                                                                                                                                                                                                   |
| Article Type:                   | Original research                                                                                                                                                                                                                                                                                                                                                                                        |
| Date Submitted by the Author:   | 03-Jul-2021                                                                                                                                                                                                                                                                                                                                                                                              |
| Complete List of Authors:       | Lassen, Mathilde Languille; Rigshospitalet, Department of Anaesthesia, Centre of Head and Orthopaedics<br>Risgaard, Bjarke; Rigshospitalet, Department of Anaesthesia, Centre of Head and Orthopaedics<br>Baekgaard, Josefine; Rigshospitalet, Department of Anaesthesia, Centre of Head and Orthopaedics<br>Rasmussen, Lars; Rigshospitalet, Department of Anaesthesia, Centre of Head and Orthopaedics |
| <b>Primary Subject Heading</b>: | Anaesthesia                                                                                                                                                                                                                                                                                                                                                                                              |
| Secondary Subject Heading:      | Respiratory medicine                                                                                                                                                                                                                                                                                                                                                                                     |
| Keywords:                       | Adult anaesthesia < ANAESTHETICS, Adult intensive & critical care < INTENSIVE & CRITICAL CARE, RESPIRATORY MEDICINE (see Thoracic Medicine), Respiratory physiology < THORACIC MEDICINE, Adult intensive & critical care < ANAESTHETICS                                                                                                                                                                  |
|                                 |                                                                                                                                                                                                                                                                                                                                                                                                          |

SCHOLARONE™  
Manuscripts



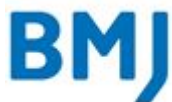

I, the Submitting Author has the right to grant and does grant on behalf of all authors of the Work (as defined in the below author licence), an exclusive licence and/or a non-exclusive licence for contributions from authors who are: i) UK Crown employees; ii) where BMJ has agreed a CC-BY licence shall apply, and/or iii) in accordance with the terms applicable for US Federal Government officers or employees acting as part of their official duties; on a worldwide, perpetual, irrevocable, royalty-free basis to BMJ Publishing Group Ltd ("BMJ") its licensees and where the relevant Journal is co-owned by BMJ to the co-owners of the Journal, to publish the Work in this journal and any other BMJ products and to exploit all rights, as set out in our [licence](#).

The Submitting Author accepts and understands that any supply made under these terms is made by BMJ to the Submitting Author unless you are acting as an employee on behalf of your employer or a postgraduate student of an affiliated institution which is paying any applicable article publishing charge ("APC") for Open Access articles. Where the Submitting Author wishes to make the Work available on an Open Access basis (and intends to pay the relevant APC), the terms of reuse of such Open Access shall be governed by a Creative Commons licence – details of these licences and which [Creative Commons](#) licence will apply to this Work are set out in our licence referred to above.

Other than as permitted in any relevant BMJ Author's Self Archiving Policies, I confirm this Work has not been accepted for publication elsewhere, is not being considered for publication elsewhere and does not duplicate material already published. I confirm all authors consent to publication of this Work and authorise the granting of this licence.

1  
2  
3  
4  
5 **Determining a safe upper limit of oxygen supplementation for adult**  
6 **patients: a systematic review**  
7  
8  
9  
10  
11  
12  
13  
14

15 Corresponding author:

16 Mathilde Languille Lassen

17 languillelassen@gmail.com

18 Department of Anesthesia, Centre of Head and Orthopedics, 4231 Rigshospitalet,

19 University of Copenhagen, Denmark  
20  
21  
22  
23  
24

25 Bjarke Risgaard, MD, PhD

26 Department of Anesthesia, Centre of Head and Orthopedics, 4231 Rigshospitalet,

27 University of Copenhagen, Denmark  
28  
29  
30  
31

32 Josefine S Bækgaard, MD, PhD

33 Department of Anesthesia, Centre of Head and Orthopedics, 4231 Rigshospitalet,

34 University of Copenhagen, Denmark  
35  
36  
37  
38

39 Lars S Rasmussen, MD, PhD, DMSc

40 Department of Anesthesia, Centre of Head and Orthopedics, 4231 Rigshospitalet,

41 University of Copenhagen, Denmark  
42  
43  
44  
45

46 Responsible department:

47 Department of Anesthesia, Centre of Head and Orthopedics, 4231 Rigshospitalet,

48 University of Copenhagen, Denmark  
49  
50  
51  
52  
53  
54  
55  
56  
57  
58  
59  
60

## Abstract

**Objective:** This systematic review aimed to describe the connection between the inspired oxygen fraction and pulmonary complications in adult patients, with the objective of determining a safe upper limit of oxygen supplementation.

**Methods:** MEDLINE and Embase were systematically searched in August 2019 (updated July 2020) for studies fulfilling the following criteria: intubated adult patients (Population); high fractions of oxygen (Intervention) versus low fractions of (Comparison); atelectasis, acute respiratory distress syndrome (ARDS), pneumonia and/or duration of mechanical ventilation (Outcome); original studies both observational and interventional (Studies). Screening, data extraction and risk of bias assessment was done by two independent reviewers.

**Results:** Out of 6120 records assessed for eligibility, 12 were included. Seven studies were conducted in the emergency setting, and five studies included patients undergoing elective surgery. Eight studies reported data on atelectasis, two on ARDS, four on pneumonia and two on duration of mechanical ventilation. There was a nonsignificant increased risk of atelectasis if an oxygen fraction of 0.8 or above was used, Relative Risk (RR):1.37 [0.95, 1.96]. One study showed an almost three-fold higher risk of pneumonia in the high oxygen fraction group (RR 2.83 [2.25-3.56]). The two studies reporting ARDS and the two studies with data on mechanical ventilation showed no association with oxygen fraction. Four studies had a high risk of bias in one domain.

**Conclusions:** In this systematic review we found inadequate evidence to identify a safe upper dosage of oxygen, but the identified studies suggest a benefit of keeping inspiratory oxygen fraction below 0.8 with regards to formation of atelectases.

**PROSPERO registration number** CRD42020154242

### Strengths and limitations of this study

- The use of predefined Population, Intervention, Comparison, Outcome and Study design to assess studies for eligibility.
- The use of a wide search string in two databases.
- Two independent reviewers screening and including studies, assessing risk of bias and extracting data.
- There is a risk of publication bias that arises due to the possibility of missing unpublished studies.
- It is possible that our search did not identify all relevant studies.

1  
2  
3  
4  
5  
6  
7  
8  
9  
10  
11  
12  
13  
14  
15  
16  
17  
18  
19  
20  
21  
22  
23  
24  
25  
26  
27  
28  
29  
30  
31  
32  
33  
34  
35  
36  
37  
38  
39  
40  
41  
42  
43  
44  
45  
46  
47  
48  
49  
50  
51  
52  
53  
54  
55  
56  
57  
58  
59  
60

## Introduction

Oxygen is a molecule vital for life, as it is the cornerstone in cellular respiration in all aerobic organisms. In trauma care, during anesthesia and in the management of respiratory failure, an oxygen fraction of 0.21 may not be sufficient to maintain an acceptable oxygen concentration in arterial blood and oxygen supplementation is therefore often part of standard care (1,2).

Supplementary oxygen may result in hyperoxaemia, with the risk of tissue hyperoxia. An increasing amount of evidence has connected hyperoxia and hyperoxaemia with increased mortality (3–6) possibly as a consequence of a variety of factors associated with hyperoxia: atelectasis in the lungs (7,8), formation of reactive oxygen species (9), impairment of the innate immune system (10), as well as vasoconstriction with paradox tissue hypoxia to follow (11).

All in all, hypoxia should be avoided, but at the same time it seems that exposure to high concentrations of oxygen may have serious consequences. Therefore, it is relevant to investigate if a safe upper dosage of oxygen can be identified.

This systematic review aimed to describe the connection between the inspired oxygen fraction  $FiO_2$  and pulmonary complications in intubated adult patients, with the objective of determining a safe upper limit of oxygen supplementation. We defined pulmonary complications as atelectasis, pneumonia and acute respiratory distress syndrome (ARDS).

## Methods

### Protocol and registration

Methods of the analysis and inclusion criteria were prespecified and documented in a protocol. The protocol was completed following the Preferred Reporting Items for Systematic Reviews and Meta-Analysis guidelines for protocols (12) and was registered in PROSPERO, the international prospective register of systematic reviews (13) (CRD42020154242).

### Eligibility criteria

Studies were selected according to following predefined Population, Intervention, Comparison, Outcome and Study design (PICOS).

#### **Inclusion criteria:**

- **P**opulation: intubated patients  $\geq 18$  years

- **I**ntervention and **C**omparison: low inspiratory oxygen fraction (FiO<sub>2</sub>) (as defined by author) vs high FiO<sub>2</sub> (as defined by authors)
- **O**utcome: atelectasis, pneumonia, ARDS and duration of mechanical ventilation (as defined by authors)
- **S**tudy design: original studies both interventional and observational

#### **Exclusion criteria:**

- Hyperbaric oxygen treatment
- Case reports, review articles and editorials

We had no restrictions on year of publication. The search was restricted to studies published in French, English or Danish.

#### Information sources and search

We searched MEDLINE and Embase using the following predefined search string (presented search strategy is from MEDLINE).

1. (((((((oxygen [Title/Abstract]) OR oxygen[MeSH Terms]) OR hyperoxia[Title/Abstract]) OR "supplemental oxygen"[Title/Abstract]) OR "oxygen supplementation"[Title/Abstract]) OR fio2[Title/Abstract]))
2. (((((((((((atelectasis[Title/Abstract]) OR pulmonary atelectasis[MeSH Terms]) OR pneumonia[Title/Abstract]) OR pneumonia[MeSH Terms]) OR "lung collapse"[Title/Abstract]) OR "collapsed lung"[Title/Abstract]) OR "acute lung injury"[Title/Abstract]) OR acute lung injury[MeSH Terms]) OR ARDS[Title/Abstract]) OR "acute respiratory distress syndrome"[Title/Abstract]) OR respiratory distress syndrome, adult[MeSH Terms]))
3. (intub\*) OR "mechanical ventilation"
4. #1 AND #2 AND #3

The search was done the 6<sup>th</sup> of August 2019. The search was updated the 6<sup>th</sup> of July 2020.

Modifications were made to fit Embase.

We identified one additional record (14) by obtaining the full-text article of an abstract identified through the search string. Another record (15) was identified by screening the reference list of an article.

### Selection process

Two independent reviewers (MLL, BR) screened all titles and abstracts yielded by the search against the inclusion criteria using Covidence (an online program facilitating the production of systematic reviews developed by the Cochrane group) (16). A Cohen's Kappa for inter-rater reliability was calculated. The same reviewers obtained full text articles for all titles that appeared to meet the inclusion criteria or where there was any uncertainty. Disagreements were resolved through discussion until consensus. All full-text articles were assessed by the same two independent reviewers and those not meeting the inclusion criteria were excluded.

### Data collection and data items

Data extraction was done by two authors (MLL, BR), and was facilitated by the data-extraction tool Covidence and by using predefined forms. We collected study characteristics including trial design, trial size, country, period and year of publication. From the included studies we extracted the dosage of oxygen, type of control used, duration of treatment, patient characteristics (gender, age, patient type) as well as data on the predefined outcomes (atelectasis, pneumonia, ARDS) as defined by the authors.

### Risk of bias

Risk of bias for non-randomized studies were assessed by using the Newcastle Ottawa Scale (17). Here each study can be awarded from zero to nine stars, with zero stars representing a high risk of bias, and nine stars a low risk. Each study can be judged and awarded stars on eight items, categorized into three domains: selection of the study group, comparability of cohorts, and evaluation of the outcome of interest.

For randomized studies we used the Cochrane Collaboration tool for assessing risk of bias (Table 8.5.a in the Cochrane Handbook for Systematic Reviews of Intervention) in Covidence, which covers: sequence generation, allocation concealment, blinding, incomplete data and selective outcome reporting. A judgement as to the possible risk of bias on each domain were made from the extracted information, rated as "high risk", "low risk" or "unclear" risk of bias. These judgements were made based on the criteria for judging the risk of bias (Table 8.5.d in the Cochrane Handbook Higgins 2011).

## Summary measures and synthesis of results

This systematic review was expected to be a descriptive summary of the current evidence on oxygen supplementation and pulmonary complications. Relative risk was calculated where possible and a forest plot was used to illustrate the results. Relative risks with 95% confidence intervals, was calculated in studies where this information was missing and the calculation was possible. The forest plot was made with a random-effects model.

## Patient and Public Involvement

No patient involved



1  
2  
3  
4  
5  
6  
7  
8  
9  
10  
11  
12  
13  
14  
15  
16  
17  
18  
19  
20  
21  
22  
23  
24  
25  
26  
27  
28  
29  
30  
31  
32  
33  
34  
35  
36  
37  
38  
39  
40  
41  
42  
43  
44  
45  
46  
47  
48  
49  
50  
51  
52  
53  
54  
55  
56  
57  
58  
59  
60

## Results

### Study selection

Our initial search strategy identified 7734 records. After duplicates were removed and two additional records from other sources were added, 6120 records were screened. Of these, 6100 were excluded as they did not fulfil eligibility criteria leaving 20 records for full-text screening. Cohen's kappa for inter-rater reliability of 0.43 (CI: 0.26 to 0.60) was calculated, which is judged to be moderate agreement. After full-text review, 12 records fulfilled the inclusion criteria (figure 1).

### Study characteristics

Study characteristics are summarized in table 1. Eight of the 12 included studies were randomized controlled trials. Among the four remaining there were two retrospective observational studies (18,19) and two prospective observational studies (20,21). About half of the studies were conducted in Europe. Seven studies were conducted in the acute care setting. Of these seven, one study (22) included patients with septic shock, four studies (14,18,21,23) recruited surgical, medical and trauma patients that were mechanically ventilated in the intensive care unit, one study (20) included patients with acute lung injury and the last study (24) recruited patients with traumatic brain injury. The remaining five studies included patients undergoing different types of elective surgery. The administered  $FiO_2$  varied substantially among the studies, with oxygen fraction ranging from 0.26 to 0.60 in the low  $FiO_2$  group and from 0.36 to 1.0 in the high  $FiO_2$  group.

Table 2 presents the outcomes of interest reported in the included studies. Eight studies reported on the incidence of atelectasis, two studies reported on ARDS, four studies reported on pneumonia and two studies reported on the duration of mechanical ventilation.

#### *Atelectasis*

The eight studies reporting on atelectasis, generally showed better outcomes for patients in the low  $FiO_2$  group, as two studies (22,25) showed almost two-fold higher risk of atelectasis in the high  $FiO_2$ , with RR: 1.875 [0.42-8.37] and RR: 2.0 [1.06-3.79], respectively. One study (15) suggested a minor benefit of treatment with low  $FiO_2$ , but this was not statistically significant, RR: 1.46 [0.97-2.20]. Another study (24) found RR: 0.91 [0.56-1.50] suggesting a benefit of treatment with high  $FiO_2$ , but this was not statistically significant. These studies are illustrated in the forest plot (figure 2), which shows that in general treatment with high  $FiO_2$  was associated with higher risk of atelectasis formation, RR:1.37 [0.95, 1.96]. The heterogeneity ( $I^2$ ) of the meta-analysis presented in

figure 2 is 31%, which corresponds to a moderate heterogeneity (Cochrane Handbook for Systematic Reviews of Intervention, section 9.5.2 Identifying and measuring heterogeneity). *Rothen et al* (8) found a 16.8 times greater area of atelectasis in the high FiO<sub>2</sub> group and similarly, the study by *Benoit et al* (26) found a three-fold larger atelectatic surface in the high FiO<sub>2</sub> group. *Suzuki et al* (21) estimated atelectasis as time weighted averages, and also found a beneficial effect of a low FiO<sub>2</sub>. In the study by *Ishii et al* (18) additional information on intubated patients were found in an abstract (27) from the same study. They found a higher incidence of atelectasis in the high FiO<sub>2</sub> group, but the total number of patients was not reported.

#### ARDS

*Panwar et al* (14) showed an increase of new-onset ARDS in the low FiO<sub>2</sub> group, RR: 0.87 (0.43-1.75), but this was not statistically significant. The study by *Lång et al* (24) found three patients with ARDS in the low FiO<sub>2</sub> group, while no patients with ARDS were identified in the group receiving high FiO<sub>2</sub>.

#### Pneumonia

The study by *Staehr-Rye et al* (19) showed a significant increase in the incidence of pneumonia, RR: 2.83 [2.25-3.56] in the high FiO<sub>2</sub> group. Similarly, *Barrot et al* (23) showed a small, but nonsignificant, tendency to ventilator-associated pneumonias in the high FiO<sub>2</sub> group, RR: 1.26 [0.71-2.22]. The two other studies, *Asfar et al* (22) and *Lång et al* (24), found a nonsignificant tendency for pneumonia in the low FiO<sub>2</sub> group with RR: 0.94 [0.59-1.49] and RR: 0.71 [0.26-1.97], respectively. These studies are illustrated in the forest plot (figure 3), which shows a non-significant tendency that treatment with high FiO<sub>2</sub> was associated with higher risk of pneumonia, RR: 1.32 [0.65, 2.70].

#### Duration of mechanical ventilation

The two studies reporting the duration of mechanical ventilation pointed in opposite direction. *Lång et al* (24) reported slightly more time spent on mechanical ventilation in the low FiO<sub>2</sub> group, while *Rachmale et al* (20) reported a two-fold increase in time in the high FiO<sub>2</sub> group.

#### Risk of bias assessment

Risk of bias for randomized studies are illustrated in table 3. Three studies had no blinding of participants, personal, or outcome assessment, leaving them with a high risk of bias on these domains (8,14,22). In the study by *Rothen et al* (8) it was unclear if a randomization was performed between the low FiO<sub>2</sub> group and the high FiO<sub>2</sub> group, indicating a high risk of bias.

1  
2  
3  
4 *Lång et al* (24) was an open-label trial, and was therefore awarded a high risk of bias on the domain  
5 of blinding of participants and personnel, however the outcome assessor was blinded.  
6

7  
8 The four non-randomized studies were assessed using the New-Castle Ottawa Scale (17). One study  
9 (20) scored six stars, two studies (18,19) scored seven stars and one study (21) scored 8 stars,  
10 indicating an overall high quality of the studies.  
11  
12  
13

## 14 15 Discussion

### 16 17 *Summary of findings*

18  
19 In this study we were not able to determine a safe upper limit of oxygen supplementation, due to  
20 inadequate evidence and heterogeneity as the included studies had different endpoints with varying  
21 definitions, and also different ways of defining low and high FiO<sub>2</sub>. In some studies the oxygen  
22 fraction in the low FiO<sub>2</sub> group was higher than in the high FiO<sub>2</sub> group in other studies.  
23  
24  
25

26  
27 Regarding atelectasis, seven of the eight studies favored a conservative oxygen strategy with low  
28 FiO<sub>2</sub> and an FiO<sub>2</sub> above 0.8 seemed to be associated with higher risk of atelectasis formation.

29  
30 Looking at figure 2, there is a relative risk of 1.37, which suggests a clinically relevant difference  
31 with less atelectasis with a lower oxygen fraction. However, the confidence interval is wide (0.95-  
32 1.96), indicating that more information is needed before any firm conclusions can be made.  
33  
34  
35

### 36 37 *Strengths and limitations*

38  
39 This study was conducted according to the PRISMA guidelines (28), ensuring a systematic and  
40 broadly acknowledged approach to the present literature. The strengths of this approach include  
41 predefined PICOS criteria to assess study eligibility, use of a wide search string in two databases,  
42 and two independent reviewers screened and assessed studies, including risk of bias.  
43  
44  
45

46  
47 Our study is limited by general weaknesses of systematic reviews. This includes risk of publication  
48 bias that arises due to the possibility of missing nonpublished studies. Despite the systematic search  
49 with predefined search string, and screening of reference lists of included studies, there is always a  
50 possibility that our search did not identify all relevant studies. However, the heterogeneity of the 12  
51 studies reviewed makes us believe that potentially missed studies would not change the conclusion  
52 substantially. It is possible that more studies could have been found by searching in a wider set of  
53 databases. However, we chose the most commonly used databases MEDLINE and EMBASE,  
54 where the quality is known to be best and where most studies are found.  
55  
56  
57  
58  
59  
60

1  
2  
3  
4 The patient population was determined in very broad terms (intubated adult patients), resulting in  
5 more heterogeneity among the included studies.  
6

7  
8 The trials varied in patient groups, associated clinical care and disease severity. Furthermore, in  
9 some studies it is unclear when exactly the outcome of interest was measured (early or late onset of  
10 ARDS and timing of CT/X-ray for measuring the presence of atelectasis). It is also unclear how  
11 pneumonia was defined in the four studies reporting this outcome. Therefore conclusions should be  
12 drawn with caution.  
13  
14

15  
16 Half of the randomized controlled trials were not blinded to personnel and participants, increasing  
17 the risk of performance bias. Three of these were not blinded to outcome assessors which increase  
18 the risk of detection bias. In general, many of the studies are relatively small, increasing the risk of  
19 other bias such as publication bias (table 3).  
20  
21  
22  
23

24  
25 Atelectasis was defined in different ways complicating the pooling of data and the possibility to  
26 undertake a meta-analysis. Three studies (8,15,25) used CT-scans and they all considered densities  
27 between -100 to +100 Hounsfield as atelectasis. Of these three, one (8) measured areas of  
28 atelectasis in cm<sup>2</sup> whereas the two others (15,25) measured if atelectases were present or not. *Ishii*  
29 *et al* (18) also used CT-scans, but defined atelectases as areas with formation of more than 10 mm  
30 thick atelectasis from the first to the second scan. The study by *Staeher et al* (25) did not define  
31 specific criteria on when densities were judged as atelectasis or not.  
32  
33

34  
35 *Asfar et al* (22) and *Suzuki et al* (21) used chest x-rays, without defining atelectasis specifically, as  
36 this was decided by the individual physician. *Lång et al* (24) used chest x-rays in the same manner,  
37 however they allowed the appliance of positive end-expiratory pressure to minimize atelectasis,  
38 which makes it hard to directly compare results with other studies. Only *Suzuki et al* (21) used more  
39 than one radiologist to perform the outcome assessment.  
40  
41  
42  
43  
44  
45  
46

47  
48 In *Panwar et al* (14), new-onset ARDS was defined as subsequent occurrence of ARDS in those  
49 patients who did not have ARDS on day 0, and where ARDS was present according to the Berlin  
50 definition (29). *Lång et al* (24) did not report their definition of ARDS.  
51  
52  
53

54  
55 Regarding pneumonia, the database study of 26841 patients performed by *Staeher-Rye et al* (19)  
56 found a significant, almost three-fold higher risk of pneumonia in the liberal oxygen group,  
57 indicating that excess levels of oxygen may be harmful. However, this is an analysis of  
58  
59  
60

1  
2  
3  
4 administrative data, with risk of misclassification bias and therefore direct conclusions should be  
5 drawn with caution.  
6  
7

### 8 9 *Other reviews*

10 The evidence for the use of supplemental oxygen has been investigated in recently published  
11 systematic reviews. A systematic review and meta-analysis by *Damiani et al* (30) from 2014  
12 suggests an association between hyperoxia and mortality in patients with stroke, traumatic brain  
13 injury and those resuscitated from cardiac arrest. However, they concluded that their results were  
14 limited by the heterogeneity of the included studies. The same conclusion was drawn in another  
15 meta-analysis from 2015 by *Helmerhorst et al* (31). No definite conclusions could be made due to  
16 heterogeneity in the included studies; however the meta-analysis suggested a benefit of conservative  
17 oxygen therapy. In a Cochrane review from 2015 by *Wetterslev et al* (32), comparing low (FiO<sub>2</sub>  
18 0.30-0.40) vs high (FiO<sub>2</sub> 0.60-0.90) perioperative inspiratory oxygen fractions, they found no  
19 association between perioperative FiO<sub>2</sub> and postoperative surgical site infection and mortality. In  
20 another Cochrane review from 2016 performed by *Cabello et al* (33), they focused on patients with  
21 acute myocardial infarctions. They included five studies and found no clear recommendations on  
22 the use of oxygen supplementation.  
23  
24

25 In a recent meta-analysis performed in 2018 by *Chu et al* (4) they included 25 randomised  
26 controlled trials on acutely ill patients and found a significant association between liberal  
27 oxygenation strategies and increased mortality in-hospital, at 30 days and at longest follow-up.  
28 Nevertheless, morbidity outcomes were similar between groups.  
29

30 The available reviews are limited because of heterogeneity, including different outcome measures,  
31 overall indicate that excess oxygen is harmful, stressing the need for further investigation on this  
32 subject.  
33

34 Oxygen supplementation is obviously a vital part of trauma care, practice of anaesthesia, the  
35 management of respiratory distress, and treatment of a variety of other conditions. However,  
36 supplemental oxygen should be carefully considered a drug and prescribed adequately. There is a  
37 general lack of strong evidence for supplemental oxygen, and an upper limit of oxygen  
38 supplementation is not included in many guidelines (1, 34-36). Our study contributes to the current  
39 evidence in a different way, by looking at the association between FiO<sub>2</sub> and pulmonary  
40 complications, which is a highly relevant indicator in the search for a safe upper limit of oxygen  
41 supplementation.  
42  
43  
44  
45  
46  
47  
48  
49  
50  
51  
52  
53  
54  
55  
56  
57  
58  
59  
60

1  
2  
3  
4 As oxygen supplementation is so widely used, it is crucial that better evidence-based guidelines are  
5 developed. Future research is required to precisely define the oxygen therapy strategies to maximize  
6 benefits and minimize harms.  
7  
8  
9

## 10 11 Conclusion

12  
13 In this systematic review we found that there was inadequate evidence to identify a safer upper  
14 dosage of oxygen, but the identified studies suggest a benefit of conservative oxygen therapy,  
15 defined as  $FiO_2 \leq 0.8$  with regards to formation of atelectasis.  
16  
17  
18  
19  
20  
21  
22  
23  
24  
25  
26  
27  
28  
29  
30  
31  
32  
33  
34  
35  
36  
37  
38  
39  
40  
41  
42  
43  
44  
45  
46  
47  
48  
49  
50  
51  
52  
53  
54  
55  
56  
57  
58  
59  
60

1  
2  
3  
4  
5  
6  
7  
8  
9  
10  
11  
12  
13  
14  
15  
16  
17  
18  
19  
20  
21  
22  
23  
24  
25  
26  
27  
28  
29  
30  
31  
32  
33  
34  
35  
36  
37  
38  
39  
40  
41  
42  
43  
44  
45  
46  
47  
48  
49  
50  
51  
52  
53  
54  
55  
56  
57  
58  
59  
60

#### Figure caption

**Figure 1:** Preferred Reporting Items for Systematic Reviews and Meta-analysis (PRISMA) flow diagram of identification, screening, eligibility and inclusion process (28) on a search for studies comparing low dose oxygen supplementation with high dose oxygen supplementation with pulmonary complications as an outcome.

**Figure 2:** Forest plot of formation of atelectasis in studies comparing low  $\text{FiO}_2$  with high  $\text{FiO}_2$ .  
Abbreviations: M.H. Random: Maentel-Haentzel Random effects model.

**Figure 3:** Forest plot of risk of pneumonia in studies comparing low  $\text{FiO}_2$  with high  $\text{FiO}_2$ .  
Abbreviations: M.H. Random: Maentel-Haentzel Random effects model.

## Ethics approval

Ethics approval was not required as this was a systematic review with no involvement of humans or animals.

## Contributorship statement

The idea for the article was formed by LSR. Literature search was performed by MLL and BR. MLL wrote the article. JSB contributed with high subject knowledge and all authors gave substantial contributions to the work. Every author revised the work critically for important intellectual content. Every author made a final approval of the version to be published. Every author agree to be accountable for all aspects of the work.

## Funding

Departmental funding. Award/Grant number is not applicable.

## Competing interests

None declared.

## Data sharing statement

This was a systematic review and researchers can contact the authors to access the material.



## References

1. O'Driscoll BR, Howard LS, Earis J et al. British Thoracic Society Guideline for oxygen use in adults in healthcare and emergency settings. *BMJ Open Respir Res.* 2017;4(1):1–20.
2. Thim T, Vinther NH, Grove EL et al. Initial assessment and treatment with the Airway, Breathing, Circulation, Disability, Exposure (ABCDE) approach. *Int J Gen Med.* 2012;117–21.
3. Brenner M, Stein D, Hu P et al. Association between early hyperoxia and worse outcomes after traumatic brain injury. *Arch Surg.* 2012;147(11):1042–6.
4. Chu DK, Kim LHY, Young PJ et al. Mortality and morbidity in acutely ill adults treated with liberal versus conservative oxygen therapy (IOTA): a systematic review and meta-analysis. *Lancet* 2018;391(10131):1693–705.
5. Wang CH, Chang WT, Huang CH et al. The effect of hyperoxia on survival following adult cardiac arrest: a systematic review and meta-analysis of observational studies. *Resuscitation* 2014;85:1142–8
6. Girardis M, Busani S, Damiani E et al. Effect of conservative vs conventional oxygen therapy on mortality among patients in an intensive care unit the oxygen-ICU randomized clinical trial. *JAMA* 2016;316(15):1583–9
7. Aboab J, Jonson B, Kouatchet A et al. Effect of inspired oxygen fraction on alveolar derecruitment in acute respiratory distress syndrome. *Intensive Care Med.* 2006 Dec;32(12):1979–86.
8. Rothen HU, Sporre B, Engberg G et al. Prevention of atelectasis during general anaesthesia. *Lancet.* 1995;345(8962):1387–91
9. Turrens JF. Mitochondrial formation of reactive oxygen species. *J Physiol.* 2003;2:335–44
10. Baleeiro CEO, Wilcoxon SE, Morris SB et al. Sublethal Hyperoxia Impairs Pulmonary Innate Immunity. *J Immunol.* 2003;171:955–63.
11. Ariyaratnam P, Loubani M, Bennett R et al. Hyperoxic Vasoconstriction of Human Pulmonary Arteries: A Novel Insight into Acute Ventricular Septal Defects. *Hindawi ISRN Cardiology.* 2013;685735
12. Shamseer L, Moher D, Clarke M et al. Preferred reporting items for systematic review and meta-analysis protocols (prisma-p) 2015: Elaboration and explanation. *BMJ* 2015;349(December 2014):1–25.

- 1  
2  
3  
4 13. PROSPERO. International prospective register of systematic reviews.  
5  
6 <https://www.crd.york.ac.uk/prospero/>  
7
- 8 14. Panwar R, Hardie M, Bellomo R et al. Conservative versus liberal oxygenation targets for  
9 mechanically ventilated patients: A pilot multicenter randomized controlled trial. *Am J*  
10 *Respir Crit Care Med*. 2016;193(1):43–51.  
11
- 12 15. Akça O, Podolsky A, Eisenhuber E et al. Comparable postoperative pulmonary atelectasis in  
13 patients given 30% or 80% oxygen during and 2 hours after colon resection.  
14 *Anesthesiology*. 1999;91(4):991–8.  
15
- 16 16. Covidence systematic review software. Veritas Health Innovation. Melbourne.  
17 [www.covidence.org](http://www.covidence.org).  
18
- 19 17. Wells GA, B Shea, D O’Connell et al. The Newcastle-Ottawa Scale (NOS) for assessing the  
20 quality of nonrandomized studies in meta-analyses. *Evidence-based Public Health* 2012.  
21 [http://www.evidencebasedpublichealth.de/download/Newcastle\\_Ottawa\\_Scale\\_Pope\\_Bruce](http://www.evidencebasedpublichealth.de/download/Newcastle_Ottawa_Scale_Pope_Bruce.pdf)  
22 [.pdf](http://www.evidencebasedpublichealth.de/download/Newcastle_Ottawa_Scale_Pope_Bruce.pdf)  
23
- 24 18. Ishii K, Morimatsu H, Ono K et al. Relationship between a High-inspired Oxygen  
25 Concentration and Dorsal Atelectasis in High-energy Trauma Patients. *Acta Med. Okayama*  
26 2020;74(1):17-26  
27
- 28 19. Staehr-Rye A, Meyhoff CS, Scheffenbichler F et al. High intraoperative inspiratory oxygen  
29 fraction and risk of major respiratory complications. *Br J Anaesth* 2017;119(1):140–9.  
30
- 31 20. Rachmale S, Li G, Wilson G et al. Practice of excessive FIO2 and effect on pulmonary  
32 outcomes in mechanically ventilated patients with acute lung injury. *Respir Care*.  
33 2012;57(11):1887–93  
34
- 35 21. Suzuki S, Eastwood GM, Goodwin MD et al. Atelectasis and mechanical ventilation mode  
36 during conservative oxygen therapy: A before-and-after study. *J Crit Care* 2015;30(6):1232–  
37 7  
38
- 39 22. Asfar P, Schortgen F, Boisramé-Helms J et al. Hyperoxia and hypertonic saline in patients  
40 with septic shock (HYPER2S): a two-by-two factorial, multicentre, randomised, clinical  
41 trial. *Lancet Respir Med*. 2017;5(3):180–90  
42
- 43 23. Barrot L, Asfar P, Mauny F et al. Liberal or Conservative Oxygen Therapy for Acute  
44 Respiratory Distress Syndrome. *N Engl J Med* 2020;382:999-1008  
45
- 46 24. Lång M, Skrifvars MB, Siironen J et al. A pilot study of hyperoxemia on neurological  
47 injury, inflammation and oxidative stress. *Acta Anaesthesiol Scand*. 2018;62(6):801–10  
48  
49  
50  
51  
52  
53  
54  
55  
56  
57  
58  
59  
60

- 1
- 2
- 3
- 4 25. Staehr AK, Meyhoff CS, Henneberg SW et al. Influence of perioperative oxygen fraction on
- 5 pulmonary function after abdominal surgery: A randomized controlled trial. *BMC Res*
- 6 *Notes*. 2012; 5:383
- 7
- 8
- 9 26. Benoît Z, Wicky S, Fischer JF et al. The Effect of Increased FIO<sub>2</sub> Before Tracheal
- 10 Extubation on Postoperative Atelectasis. *Anesth Analg* 2002;95:1777–81
- 11
- 12
- 13 27. Ishii K, Morimatsu H, Ono K et al. Relationship between a high inspired oxygen
- 14 concentration and a gravity dependent atelectasis in trauma patients: a subgroup analysis.
- 15 2015 Annu Meet Int Anesth Res Soc IARS 2015 Honolulu, HI United States 2015;120(3
- 16 SUPPL. 1):S109
- 17
- 18
- 19
- 20 28. Moher D, Liberati A, Tetzlaff J et al. Preferred reporting items for systematic reviews and
- 21 meta-analyses: the PRISMA statement. *Int J Surg* 2010;8(8):658
- 22
- 23 29. Rawal G, Yadav S, Kumar R. Acute respiratory distress syndrome: An update and review. *J*
- 24 *Transl Intern Med*. 2016;6(2):74–7.
- 25
- 26 30. Damiani E, Adrario E, Girardis M et al. Arterial hyperoxia and mortality in critically ill
- 27 patients: A systematic review and meta-analysis. *Crit Care* 2014;18(1).
- 28
- 29
- 30 31. Helmerhorst HJF, Roos-Blom MJ, Van Westerloo DJ et al. Association between arterial
- 31 hyperoxia and outcome in subsets of critical illness: A systematic review, meta-analysis, and
- 32 meta-regression of cohort studies. *Crit Care Med* 2015;43(7):1508–19
- 33
- 34 32. Wetterslev J, Meyhoff CS, Jørgensen LN et al. The effects of high perioperative inspiratory
- 35 oxygen fraction for adult surgical patients. *Cochrane Database Syst Rev* 2015(6):CD008884.
- 36
- 37 33. Cabello JB, Burls A, Empananza JI et al. Oxygen therapy for acute myocardial infarction.
- 38 *Cochrane Database Syst Rev* 2016(12): CD007160.
- 39
- 40 34. Casaubon LK, Boulanger JM, Blacquièrè D et al. Canadian Stroke Best Practice
- 41 Recommendations: Hyperacute Stroke Care Guidelines, Update 2015. *Int J Stroke*.
- 42 2015;10(6):924–40
- 43
- 44 35. Nikolaou NI, Welsford M, Beygui F et al. Part 5: Acute coronary syndromes. 2015
- 45 International Consensus on Cardiopulmonary Resuscitation and Emergency Cardiovascular
- 46 Care Science with Treatment Recommendations. *Resuscitation*. 2015;95(2015):e121–46
- 47
- 48 36. Moga C, Chojecki D. Oxygen therapy in acute care settings. Institute of Health Economics
- 49 2016. <https://www.ihe.ca/publications/oxygen-therapy-in-acute-care-settings>
- 50
- 51
- 52
- 53
- 54
- 55
- 56
- 57
- 58
- 59
- 60

**Table 1: Characteristics of studies comparing low FiO<sub>2</sub> with high FiO<sub>2</sub>, with lung complications as an outcome. Lung complications were atelectasis, ARDS, pneumonia and duration of mechanical ventilation.**

| Reference and year of publication | Country                | Setting                       | Study design                     | Sample size | Low dose oxygen                     | High dose oxygen       | Primary outcome                                                                                        |
|-----------------------------------|------------------------|-------------------------------|----------------------------------|-------------|-------------------------------------|------------------------|--------------------------------------------------------------------------------------------------------|
| Akca et al (1999) (15)            | Austria                | Elective surgery              | Randomized controlled trial      | 30          | 0.3                                 | 0.8                    | Atelectasis                                                                                            |
| Asfar et al (2017) (22)           | France                 | Septic shock                  | Randomized controlled trial      | 434         | SpO <sub>2</sub> between 88 and 95% | 1.0                    | Mortality day-28                                                                                       |
| Barrot et al (2020) (23)          | France                 | Critical care                 | Randomized controlled trial      | 205         | SpO <sub>2</sub> between 88 and 92% | SpO <sub>2</sub> ≥ 96% | Mortality day-28                                                                                       |
| Benoît et al (2002) (26)          | Switzerland            | Elective surgery              | Randomized controlled trial      | 20          | 0.4                                 | 1.0                    | Atelectasis                                                                                            |
| Ishii et al (2015) (18)           | Japan                  | Trauma                        | Retrospective cohort study       | 911         | < 0.6                               | > 0.6                  | Atelectasis                                                                                            |
| Lång et al (2018) (24)            | Finland                | Critical care                 | Randomized controlled trial      | 65          | 0.4                                 | 0.7                    | Levels of ROS, IL-6 and NSE                                                                            |
| Panwar et al (2015) (14)          | Australia, NZ & France | Critical care                 | Randomized controlled trial      | 104         | Mean = 0.26                         | Mean = 0.36            | Mean AUC for SpO <sub>2</sub> , SaO <sub>2</sub> , PaO <sub>2</sub> , and FIO <sub>2</sub> on days 0–7 |
| Rachmale et al (2012) (20)        | USA                    | Critical care                 | Prospective, observational study | 210         | Mean = 0.4                          | Mean = 0.6             | Duration of exposure to excessive FiO <sub>2</sub> during the first 48 h of mechanical ventilation     |
| Rothen et al (1995) (8)           | Sweden                 | Elective surgery              | Randomized controlled trial      | 24          | 0.3                                 | 1.0                    | Atelectasis                                                                                            |
| Staehr et al (2012) (25)          | Denmark                | Laparotomy for ovarian cancer | Randomized controlled trial      | 35          | 0.3                                 | 0.8                    | Change in PaO <sub>2</sub> /FiO <sub>2</sub>                                                           |

1  
2  
3  
4  
5  
6  
7  
8  
9  
10  
11  
12  
13  
14  
15  
16  
17  
18  
19  
20  
21  
22  
23  
24  
25  
26  
27  
28  
29  
30  
31  
32  
33  
34  
35  
36  
37  
38  
39  
40  
41  
42  
43  
44  
45  
46  
47  
48  
49  
50  
51  
52  
53  
54  
55  
56  
57  
58  
59  
60

|                              |           |                            |                                    |       |      |      |                                 |
|------------------------------|-----------|----------------------------|------------------------------------|-------|------|------|---------------------------------|
| Staehr-Rye et al (2017) (19) | USA       | Non-cardiothoracic surgery | Register study                     | 26841 | 0.31 | 0.79 | Major respiratory complications |
| Suzuki et al (2015) (21)     | Australia | Critical care              | Prospective before-and-after study | 105   | 0.27 | 0.40 | Changes in atelectasis score    |

Abbreviations: AUC: area under the curve

For peer review only

**Table 2: Patient outcomes comparing low doses of oxygen supplementation with high doses of oxygen supplementation**

| Reference                          | Low dose oxygen            | High dose oxygen          | RR (95% CI)      |
|------------------------------------|----------------------------|---------------------------|------------------|
| Atelectasis                        |                            |                           |                  |
| Akca et al (15)                    | 9 (64%)                    | 15 (94%)                  | 1.46 (0.97-2.2)  |
| Asfar et al (22)                   | 13 (6%)                    | 26 (12%)                  | 2.0 (1.06-3.79)  |
| Benoit et al (26)                  | 2.5% of total surface      | 7% of total surface       | -                |
| Ishii et al (18)                   | 64% of patients            | 76.8% of patients         | -                |
| Lång et al (24)                    | 14 (52%)                   | 18 (47%)                  | 0.914 (0.56-1.5) |
| Rothen et al (8)                   | 0.25 cm <sup>2</sup> ± 0.4 | 4.2 cm <sup>2</sup> ± 5.6 | -                |
| Staehr et al (25)                  | 2 (13.3%)                  | 5 (25%)                   | 1.88 (0.42-8.37) |
| Suzuki et al (21)                  | TWA AS = 1.5 (0.7-2)       | TWA AS = 2 (1.2-2.2)      | -                |
| ARDS                               |                            |                           |                  |
| Lång et al (24)                    | 3 (11%)                    | 0 (0%)                    | -                |
| Panwar et al (14)                  | 11 (32%)                   | 11 (28%)                  | 0.87 (0.43-1.75) |
| Pneumonia                          |                            |                           |                  |
| Asfar et al (22)                   | 32 (15%)                   | 30 (14%)                  | 0.94 (0.59-1.49) |
| Barrot et al (23)                  | 17 (17.2%)                 | 22 (21.6%)                | 1.26 (0.71-2.22) |
| Lång et al (24)                    | 6 (22.2%)                  | 6 (15.8%)                 | 0.71 (0.26-1.97) |
| Staehr-Rye et al (19)              | 104 (0.7%)                 | 227 (1.9%)                | 2.83 (2.25-3.56) |
| Duration of mechanical ventilation |                            |                           |                  |
| Lång et al (24)                    | 6.3 days (4.7-10)          | 5 days (2.5-7.5)          | -                |
| Rachmale et al (20)                | 2.8 days (1-6)             | 6 days (3-10.5)           | -                |

Continuous data is presented as mean (SD) or median (IQR). Relative risk (RR) is presented with high dose oxygen in the numerator. Abbreviations: RR: relative risk, CI: confidence interval, TWA AS: time weighted average atelectasis, SD: standard deviation, IQR: interquartile range

**Table 3: Risk of bias assessment for randomized controlled trials comparing low dose oxygen supplementation with high dose oxygen supplementation. Risk of bias was assessed using Cochrane Collaboration tool for assessing risk of bias (Table 8.5.a in the Cochrane Handbook for Systematic Reviews of Intervention).**

|                                       | Akca et al                                                                          | Asfar et al                                                                         | Barrot et al                                                                        | Benoi t et al                                                                       | Lång et al                                                                          | Panw ar et al                                                                         | Rothe n et al                                                                         | Staehr et al                                                                          |
|---------------------------------------|-------------------------------------------------------------------------------------|-------------------------------------------------------------------------------------|-------------------------------------------------------------------------------------|-------------------------------------------------------------------------------------|-------------------------------------------------------------------------------------|---------------------------------------------------------------------------------------|---------------------------------------------------------------------------------------|---------------------------------------------------------------------------------------|
| Random sequence generation            |    |    |    |    |    |    |    |    |
| Allocation concealment                |    |    |    |    |    |    |    |    |
| Blinding of participants and personal |    |    |    |    |    |    |    |    |
| Blinding of outcome assessment        |    |    |    |    |    |    |    |    |
| Incomplete outcome data               |  |  |  |  |  |  |  |  |
| Selective reporting                   |  |  |  |  |  |  |  |  |
| Other bias                            |  |                                                                                     |                                                                                     |  |                                                                                     |  |                                                                                       |  |

Green = low risk of bias, yellow = unclear risk of bias, red = high risk of bias



From: Moher D, Liberati A, Tetzlaff J, Altman DG, The PRISMA Group (2009). Preferred Reporting Items for Systematic Reviews and Meta-Analyses: The PRISMA Statement. PLoS Med 6(6): e1000097. doi:10.1371/journal.pmed1000097

For more information, visit [www.prisma-statement.org](http://www.prisma-statement.org).

**Figure 1:** Preferred Reporting Items for Systematic Reviews and Meta-analysis (PRISMA) flow diagram of identification, screening, eligibility and inclusion process (28) on a search for studies comparing low dose oxygen supplementation with high dose oxygen supplementation with pulmonary complications as an outcome.

215x279mm (300 x 300 DPI)



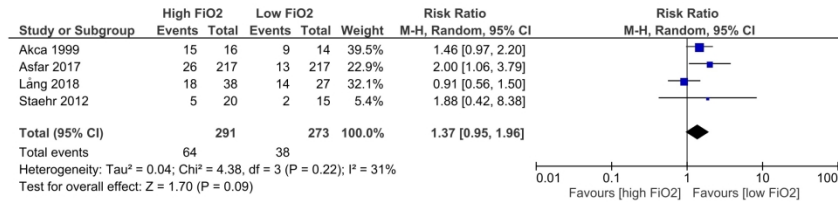

**Figure 2:** Forest plot of formation of atelectasis in studies comparing low FiO<sub>2</sub> with high FiO<sub>2</sub>.  
 Abbreviations: M.H. Random: Maentel-Haentzel Random effects model.

209x278mm (300 x 300 DPI)

1  
2  
3  
4  
5  
6  
7  
8  
9  
10  
11  
12  
13  
14  
15  
16  
17  
18  
19  
20  
21  
22  
23  
24  
25  
26  
27  
28  
29  
30  
31  
32  
33  
34  
35  
36  
37  
38  
39  
40  
41  
42  
43  
44  
45  
46  
47  
48  
49  
50  
51  
52  
53  
54  
55  
56  
57  
58  
59  
60



**Figure 3:** Forest plot of risk of pneumonia in studies comparing low FiO2 with high FiO2. Abbreviations: M.H. Random: Maental-Haentzel Random effects model.

209x297mm (300 x 300 DPI)



# PRISMA 2009 Checklist (Adapted for KIN 4400)

Page 1 of 2

| Section/topic                      | #  | Checklist item                                                                                                                                                                                                                                                       | Reported on page # |
|------------------------------------|----|----------------------------------------------------------------------------------------------------------------------------------------------------------------------------------------------------------------------------------------------------------------------|--------------------|
| <b>TITLE</b>                       |    |                                                                                                                                                                                                                                                                      |                    |
| Title                              | 1  | Identify the report as a literature review.                                                                                                                                                                                                                          | 1                  |
| <b>ABSTRACT</b>                    |    |                                                                                                                                                                                                                                                                      |                    |
| Structured summary                 | 2  | Provide a structured summary including, as applicable: background; objectives; data sources; study eligibility criteria, participants, and interventions; study appraisal and synthesis methods; results; limitations; conclusions and implications of key findings; | 2                  |
| <b>INTRODUCTION</b>                |    |                                                                                                                                                                                                                                                                      |                    |
| Rationale                          | 3  | Describe the rationale for the review in the context of what is already known about your topic.                                                                                                                                                                      | 4                  |
| Objectives                         | 4  | Provide an explicit statement of questions being addressed with reference to participants, interventions, comparisons, outcomes, and study design (PICOS).                                                                                                           | 4                  |
| <b>METHODS</b>                     |    |                                                                                                                                                                                                                                                                      |                    |
| Eligibility criteria               | 5  | Specify study characteristics (e.g., PICOS, length of follow-up) and report characteristics (e.g., years considered, language, publication status) used as criteria for eligibility, giving rationale.                                                               | 4                  |
| Information sources                | 6  | Describe all information sources (e.g., databases with dates of coverage) in the search and date last searched.                                                                                                                                                      | 5                  |
| Search                             | 7  | Present full electronic search strategy for at least one database, including any limits used, such that it could be repeated.                                                                                                                                        | 5                  |
| Study selection                    | 8  | State the process for selecting studies (i.e., screening, eligibility).                                                                                                                                                                                              | 6                  |
| Risk of bias in individual studies | 9  | Describe methods used for assessing risk of bias of individual studies (including specification of whether this was done at the study or outcome level).                                                                                                             | 6                  |
| Risk of bias across studies        | 10 | Specify any assessment of risk of bias that may affect the cumulative evidence (e.g., publication bias, selective reporting within studies).                                                                                                                         | 6                  |
| <b>RESULTS</b>                     |    |                                                                                                                                                                                                                                                                      |                    |
| Study selection                    | 11 | Give numbers of studies screened, assessed for eligibility, and included in the review, with reasons for exclusions at each stage, ideally with a flow diagram.                                                                                                      | 8                  |
| Study characteristics              | 12 | For each study, present characteristics for which data were extracted (e.g., study size, PICOS, follow-up period) and provide the citations.                                                                                                                         | 8                  |



## PRISMA 2009 Checklist (Adapted for KIN 4400)

| Section/topic                              | #  | Checklist item                                                                                                                                                                                                                            | Reported on page # |
|--------------------------------------------|----|-------------------------------------------------------------------------------------------------------------------------------------------------------------------------------------------------------------------------------------------|--------------------|
| Synthesis of results of individual studies | 13 | For all outcomes considered (benefits or harms), present, for each study: (a) summary of results and (b) relationship to other studies under review (e.g. agreements or disagreements in methods, sampling, data collection or findings). | 8                  |
| <b>DISCUSSION</b>                          |    |                                                                                                                                                                                                                                           |                    |
| Summary of evidence                        | 14 | Summarize the main findings including the strength of evidence for each main outcome; consider their relevance to key groups (e.g., healthcare providers, users, and policy makers).                                                      | 10                 |
| Limitations                                | 15 | Discuss limitations at study and outcome level (e.g., risk of bias), and at review-level (e.g., incomplete retrieval of identified research, reporting bias).                                                                             | 10                 |
| <b>CONCLUSION</b>                          |    |                                                                                                                                                                                                                                           |                    |
| Conclusions                                | 16 | Provide a general interpretation of the results in the context of other evidence, and implications for future research.                                                                                                                   | 13                 |

Adapted from: Moher D, Liberati A, Tetzlaff J, Altman DG, The PRISMA Group (2009). Preferred Reporting Items for Systematic Reviews and Meta-Analyses: The PRISMA statement. *PLoS Medicine*, 6(6), e1000097. doi:10.1371/journal.pmed1000097

For more information, visit: [www.prisma-statement.org](http://www.prisma-statement.org).

Page 2 of 2
